# Supplementary material for: Implementing Horizon Scanning as a tool for the strategic development of regulatory guidelines for nanotechnology-enabled health products
Source: Front Med (Lausanne). 2024 Jan 11;10:1308047. doi: 10.3389/fmed.2023.1308047 (PMC10829765; doi:10.3389/fmed.2023.1308047)
Supplement: Supplementary file 2 [file Table_2.XLSX]

## Sheet: Supplementary Table 2
Supplementary Table 2: Regulatory database (as of 31st August 2023).
Source	Status	Document type	Name	Date	Link	NHP signature	Scope
ASTM	Under development	Standard	ASTM WK83164 - New Test Method for Analysis of Lipid Nanoparticle Formulations Using Multi-Detector Asymmetrical-Flow Field-Flow Fractionation	N/A	https://www.astm.org/products-services/standards-and-publications/standards/workitem-wk83164	0.0.3s.1	This test method describes a measurement procedure to reproducibly separate lipid nanoparticle formulations (loaded with RNA) into their component populations and to characterize their associated size and size distribution. The method can also yield information on the shape and physical stability of the analytes, and is applicable to measurements in the presence of serum proteins. Fractions can b…
ASTM	Under revision	Standard	ASTM WK77765 - Revision of E2526-08(2013) Standard Test Method for Evaluation of Cytotoxicity of Nanoparticulate Materials in Porcine Kidney Cells and Human Hepatocarcinoma Cells	N/A	https://www.astm.org/products-services/standards-and-publications/standards/workitem-wk77765	0.0.0.0	The proposed standard practice is derived from the standard method E2526 Standard Test Method for Evaluation of Cytotoxicity of Nanoparticulate Materials in Porcine Kidney Cells and Human Hepatocarcinoma Cells, first approved in 2008 and reapproved with no changes in 2013. The practice is intended to guide researchers in conducting the biological characterization of nanomaterials. The change in f…
ASTM	Under revision	Standard	ASTM WK77764 - Revision of E2525-08(2013) Standard Test Method for Evaluation of the Effect of Nanoparticulate Materials on the Formation of Mouse Granulocyte-Macrophage Colonies	N/A	https://www.astm.org/products-services/standards-and-publications/standards/workitem-wk77764	0.0.0.0	The proposed standard practice is derived from the standard method E2525 Standard Test Method for Evaluation of the Effect of Nanoparticulate Materials on the Formation of Mouse Granulocyte-Macrophage Colonies, first approved in 2008 and reapproved with no changes in 2013. The practice is intended to guide researchers in conducting the biological characterization of nanomaterials. The change in f…
ASTM	Under revision	Standard	ASTM WK77763 - Revision of E2524-08(2013) Standard Test Method for Analysis of Hemolytic Properties of Nanoparticles	N/A	https://www.astm.org/products-services/standards-and-publications/standards/workitem-wk77763	0.0.0.0	The proposed standard practice is derived from the standard method E2524 Standard Test Method for Analysis of Hemolytic Properties of Nanoparticles, first approved in 2008 and reapproved with no changes in 2013. The practice is intended to guide researchers in conducting the biological characterization of nanomaterials. The change in format from standard method to standard practice is needed due …
ASTM	Current version	Standard	ASTM E3351-22 - Standard Test Method for Detection of Nitric Oxide Production In Vitro	2022-07-19	https://www.astm.org/e3351-22.html	0.0.0.0	1.1 This test method delivers a protocol for a quantitative measure of nitrite (NO2–), a stable end-product of nitric oxide (NO), in cell culture medium due to exposure to nanomaterial(s). 1.2 NO has a critical role in several pathological conditions in addition to its role in many physiological processes. 1.3 This test method uses murine macrophage cell line RAW 264.7 as an in vitro model. 1.4 T…
ASTM	Current version	Standard	ASTM E3324-22 - Standard Test Method for Lipid Quantitation in Liposomal Formulations Using Ultra-High-Performance Liquid Chromatography (UHPLC) with Triple Quadrupole Mass Spectrometry (TQMS)	2022-04-11	https://www.astm.org/e3324-22.html	0.0.3s.1	1.1 This test method describes the determination of lipid components in liposomal formulations, which includes sample solubilization in methanol followed by separation of the analytes using ultra-high-performance liquid chromatography (UHPLC) and detection with tandem mass-spectrometry (MS/MS). This test method adheres to multiple reaction monitoring (MRM) mass spectrometry on a triple quadrupole…
ASTM	Current version	Standard	ASTM E3323-22 - Standard Test Method for Lipid Quantitation in Liposomal Formulations Using High Performance Liquid Chromatography (HPLC) with an Evaporative Light-Scattering Detector (ELSD)	2022-11-02	https://www.astm.org/e3323-22.html	0.0.3s.1	1.1 This test method describes an analytical technique to quantify lipid components that are often present in liposomal formulations as major components. 1.2 This test method uses high performance liquid chromatography (HPLC) to separate lipids in liposomal formulations and evaporative light-scattering detection (ELSD) to quantify the individual components. 1.3 This test method quantifies three m…
ASTM	Current version	Standard	ASTM E3297-21 - Standard Test Method for Lipid Quantitation in Liposomal Formulations Using High Performance Liquid Chromatography (HPLC) with a Charged Aerosol Detector (CAD)	2022-04-11	https://www.astm.org/e3297-21.html	0.0.3s.1	1.1 This test method is for the separation of lipids in liposomal formulations through high performance liquid chromatography (HPLC) and their quantitation using a mass-flow sensitive charged aerosol detector (CAD). 1.2 This test method is specifically for liposomal formulations containing cholesterol, 1,2-distearoyl-sn-glycero-3-phosphoethanolamine-N-[methoxy(polyethylene glycol)-2000] (DSPE-PEG…
ASTM	Current version	Standard	ASTM E2865-12(2022) - Standard Guide for Measurement of Electrophoretic Mobility and Zeta Potential of Nanosized Biological Materials	2022-10-05	https://www.astm.org/e2865-12r22.html	0.0.0.0	1.1 This guide deals with the measurement of mobility and zeta potential in systems containing biological material such as proteins, DNA, liposomes and other similar organic materials that possess particle sizes in the nanometer scale (<100 nm). 1.2 The values stated in SI units are to be regarded as standard. No other units of measurement are included in this standard. 1.3 This standard does not…
ASTM	Current version	Standard	ASTM E2834-12(2022) - Standard Guide for Measurement of Particle Size Distribution of Nanomaterials in Suspension by Nanoparticle Tracking Analysis (NTA)	2022-10-05	https://www.astm.org/e2834-12r22.html	0.0.0.0	1.1 This guide deals with the measurement of particle size distribution of suspended particles, from ~10 nm to the onset of sedimentation, sample dependent, using the nanoparticle tracking analysis (NTA) technique. It does not provide a complete measurement methodology for any specific nanomaterial, but provides a general overview and guide as to the methodology that should be followed for good p…
ASTM	Current version	Standard	ASTM E2490-09(2021) - Standard Guide for Measurement of Particle Size Distribution of Nanomaterials in Suspension by Photon Correlation Spectroscopy (PCS)	2021-02-04	https://www.astm.org/e2490-09r21.html	0.0.0.0	1.1 This guide deals with the measurement of particle size distribution of suspended particles, which are solely or predominantly sub-100 nm, using the photon correlation (PCS) technique. It does not provide a complete measurement methodology for any specific nanomaterial, but provides a general overview and guide as to the methodology that should be followed for good practice, along with potenti…
ASTM	Withdrawn	Standard	ASTM E2909-13 - Standard Guide for Investigation/Study/Assay Tab-Delimited Format for Nanotechnologies (ISA-TAB-Nano): Standard File Format for the Submission and Exchange of Data on Nanomaterials and Characterizations (Withdrawn 2021)	2021-12-29	https://www.astm.org/e2909-13.html	0.0.0.0	1.1 This guide (ISA-TAB-Nano) specifies the format for representing and sharing information about nanomaterials, small molecules and biological specimens along with their assay characterization data (including metadata, and summary data) using spreadsheet or TAB-delimited files. 1.2 The Appendices Sections contain a detailed listing of ISA-TAB-Nano fields (Appendix X1), a practical example (Appen…
ASTM	Current version	Standard	ASTM E3172-18 - Standard Guide for Reporting Production Information and Data for Nano-Objects	2018-07-12	https://www.astm.org/e3172-18.html	0.0.0.0	1.1 This guide provides guidelines for describing the production of one or more individual nano-objects. It establishes essential and desirable information categories and descriptors important to specify the production process, including the starting materials, the process itself, and the resulting nano-objects. 1.2 This guide is designed to be directly applicable to reporting production informat…
ASTM	Current version	Standard	ASTM E3144-19 - Standard Guide for Reporting the Physical and Chemical Characteristics of Nano-Objects	2019-09-26	https://www.astm.org/e3144-19.html	0.0.0.0	1.1 This guide provides guidelines for a description system for reporting the physical and chemical characteristics of individual nano-objects. It establishes information categories and descriptors useful in describing individual nano-objects uniquely and such that the equivalency of two or more individual nano-objects can be determined according to specific criteria. 1.2 This guide is designed t…
ASTM	Current version	Standard	E2456-06(2020) Standard Terminology Relating to Nanotechnology	2020-12-09	https://www.astm.org/e2456-06r20.html	0.0.0.0	1.1 Nanotechnology is an emerging field; this standard defines the novel terminology developed for its broad multi- and interdisciplinary activities. As the needs of this area develop, this standard will evolve accordingly. Its content may be referenced or adopted, or both, in whole or in part, as demanded by the needs of the individual user. 1.2 The values stated in SI units are to be regarded a…
ASTM	Current version	Standard	ASTM E3269-21 - Standard Test Method for Determination of the Mass Fraction of Particle-Bound Gold in Colloidal Gold Suspensions	2021-07-07	https://www.astm.org/e3269-21.html	0.0.1.1	This test method describes the use of inductively coupled plasma optical emission spectrometry (ICP-OES; also includes ICP-AES, where AES is atomic emission spectrometry) or inductively coupled plasma mass spectrometry (ICP-MS) for the determination of the mass fraction of particle bound gold (Au) in colloidal Au suspensions. Particle bound Au is defined as the mass of Au associated with the nano…
ASTM	Current version	Standard	ASTM E3206-19 - Standard Guide for Reporting the Physical and Chemical Characteristics of a Collection of Nano-Objects	2019-12-13	https://www.astm.org/e3206-19.html	0.0.0.0	1.1 This guide provides guidelines for a description system to report the physical and chemical characteristics of collections of nano-objects. It establishes information categories and descriptors useful in describing collections of nano-objects uniquely and such that the equivalency of two or more collections of nano-objects can be determined according to specific criteria. 1.2 This guide is de…
ASTM	Under development	Standard	ASTM WK76821 - New practice for standard practice for the synthesis and assembly of nucleic acid nanoparticles	N/A	https://www.astm.org/products-services/standards-and-publications/standards/workitem-wk76821	1.2.2.1	The development of standards and guidance for nanotechnology & nanomaterials, and 2) the coordination of existing ASTM standardization related to nanotechnology needs. This coordination shall include the apportioning of specific requests for nanotechnology standards through ASTM's existing committee base, as well as the maintenance of appropriate global liaison relationships with activities (inte…
ASTM	Under development	Standard	ASTM WK75607 - New Guide for Characterization of Encapsulation, Extraction, and Analysis of RNA in Lipid Nanoparticle Formulations for Drug Delivery	N/A	https://www.astm.org/products-services/standards-and-publications/standards/workitem-wk75607	2.3.3s.1	The development of standards and guidance for nanotechnology & nanomaterials, and 2) the coordination of existing ASTM standardization related to nanotechnology needs. This coordination shall include the apportioning of specific requests for nanotechnology standards through ASTM's existing committee base, as well as the maintenance of appropriate global liaison relationships with activities (inte…
ASTM	Under development	Standard	ASTM WK67980 - New Test Method for Quantifying Poly(ethylene glycol) Coating on the Surface of Gold Nanostructured Materials Using High Performance Liquid Chromatography with Evaporative Light Scattering Detection (HPLC/ELSD)	N/A	https://www.astm.org/products-services/standards-and-publications/standards/workitem-wk67980	2.3.1.0	The development of standards and guidance for nanotechnology & nanomaterials, and 2) the coordination of existing ASTM standardization related to nanotechnology needs. This coordination shall include the apportioning of specific requests for nanotechnology standards through ASTM's existing committee base, as well as the maintenance of appropriate global liaison relationships with activities (inte…
ASTM	Under development	Standard	ASTM WK59121 - New Practice for an Extensible Nanoparticle Ontology	N/A	https://www.astm.org/products-services/standards-and-publications/standards/workitem-wk59121	0.0.0.0	The development of standards and guidance for nanotechnology & nanomaterials, and 2) the coordination of existing ASTM standardization related to nanotechnology needs. This coordination shall include the apportioning of specific requests for nanotechnology standards through ASTM's existing committee base, as well as the maintenance of appropriate global liaison relationships with activities (inte…
ASTM	Under development	Standard	ASTM WK69051 - New Test Method for Assessing the Activation of the Complement System in Human Plasma Through Quantification of iC3b Concentration by ELISA,	N/A	https://www.astm.org/DATABASE.CART/WORKITEMS/WK69051.htm	0.0.0.0	The purpose of this assay is to determine complement activation by nanoparticles . Nanoparticles which may absorb within the assay range of the Enzyme Linked Immunosorbent Assay (ELISA) should be treated with caution due to interference. Inhibition/enhancement controls should always be included.
ASTM	Under development	Standard	ASTM WK60553 - New Guide for Evaluation of Nanoparticulate Material Internalization by Phagocytic Cells In Vitro	N/A	https://www.astm.org/DATABASE.CART/WORKITEMS/WK60553.htm	0.0.0.0	1.1This test method provides a protocol for rapid and qualitative evaluation of a nanoparticulate material internalization by phagocytic cells. 1.2Phagocytic cells play an important role in the inflammatory process. 1.3Testing the internalization of nanoparticulate material by phagocytic cells in vitro helps to predict both uptake by macrophages and distribution to the organs of the reticuloendot…
ASTM	Under development	Standard	ASTM WK68060 - New Test Method for Analysis of Liposomal Drug Formulations using Multidetector Asymmetrical-Flow Field-Flow Fractionation (AF4)	N/A	https://www.astm.org/DATABASE.CART/WORKITEMS/WK68060.htm	2.3.3s.1	Liposomal formulations are the major class of drug products containing nanomaterial submitted to regulatory agencies across the globe. Liposome carriers are attractive for industry due to the long clinical history, with some products already approved as generics. Particle size and size distribution are critical quality attributes of liposomal formulations relevant to product development, quality …
ASTM	Current version	Standard	ASTM E3220-20 - Standard Guide for Characterization of Graphene Flakes	2020-05-13	https://www.astm.org/e3220-20.html	0.0.3.0	1.1 This standard will provide guidance on the measurement approaches for assessment of lateral flake size, average flake thickness, Raman intensity ratio of the D to G bands, and carbon/oxygen ratio for graphene and related products. The techniques included here are atomic force microscopy, Raman spectroscopy and X-ray photoelectron spectroscopy. Examples will be given for each type of measureme…
ASTM	Current version	Standard	ASTM E2864-18(2022) - Standard Test Method for Measurement of Airborne Metal Oxide Nanoparticle Surface Area Concentration in Inhalation Exposure Chambers using Krypton Gas Adsorption	2022-11-24	https://www.astm.org/e2864-18r22.html	0.0.1.0	1.1 This test method covers determination of surface area of airborne metal oxide nanoparticles in inhalation exposure chambers for inhalation toxicology studies. Surface area may be measured by gas adsorption methods using adsorbates such as nitrogen, krypton, and argon (Brunauer et al. (1),2 Anderson (2), Gregg and Sing (3)) or by ion attachment and mobility-based methods (Ku and Maynard (4)). …
ASTM	Current version	Standard	ASTM E2859-11(2017) - Standard Guide for Size Measurement of Nanoparticles Using Atomic Force Microscopy	2017	http://www.astm.org/cgi-bin/resolver.cgi?E2859	0.0.0.0	1.1 The purpose of this document is to provide guidance on the quantitative application of atomic force microscopy (AFM) to determine the size of nanoparticles2 deposited in dry form on flat substrates using height (z-displacement) measurement. Unlike electron microscopy, which provides a two-dimensional projection or a two-dimensional image of a sample, AFM provides a three-dimensional surface p…
ASTM	Current version	Standard	ASTM E2578 - 07(2022) - Standard Practice for Calculation of Mean Sizes/Diameters and Standard Deviations of Particle Size Distributions	2022-10-05	https://www.astm.org/e2578-07r22.html	0.0.0.0	1.1 The purpose of this practice is to present procedures for calculating mean sizes and standard deviations of size distributions given as histogram data (see Practice E1617). The particle size is assumed to be the diameter of an equivalent sphere, for example, equivalent (area/surface/volume/perimeter) diameter. 1.2 The mean sizes/diameters are defined according to the Moment-Ratio (M-R) defini…
ASTM	Current version	Standard	ASTM E3275-21 - Standard Guide for Visualization and Identification of Nanomaterials in Biological and Nonbiological Matrices Using Darkfield Microscopy/Hyperspectral Imaging (DFM/HSI) Analysis	2021-07-14	https://www.astm.org/e3275-21.html	0.0.0.0	1.1The guide contains general information and has been prepared in order to familiarize laboratory scientists with the background and content necessary to image and identify engineered nanoparticles in mammalian cells using darkfield microscopy/hyperspectral imaging (DFM/HSI). 1.2The guide covers the recommended criteria and considerations for performing DFM/HSI analyses on mammalian cells contai…
ASTM	Current version	Standard	ASTM E3238-20 - Standard Test Method for Quantitative Measurement of the Chemoattractant Capacity of a Nanoparticulate Material in vitro	2020-01-15	https://www.astm.org/e3238-20.html	0.0.0.0	1.1 This test method provides a protocol for rapid and quantitative measurement of the chemoattractant capacity of a nanoparticulate material (nanoparticles and their aggregates and agglomerates). 1.2 Immune cells recruitment (by chemotaxis) plays a central role in the immune system function especially in the inflammatory process. 1.3 This test method uses an in vitro model. In this model, periph…
ASTM	Current version	Standard	ASTM E3089-22 - Standard Guide for Nanotechnology Workforce Education in Material Properties and Effects of Size	2022-04-15	https://www.astm.org/e3089-22.html	0.0.0.0	1.1 This guide provides a framework for a basic workforce education in material properties at the nanoscale, to be taught at an undergraduate college level. This education should be broad to prepare an individual to serve within one of the many areas in nanotechnology research, development, or manufacturing. 1.2 This guide may be used to develop or evaluate an education program for unique materia…
ASTM	Current version	Standard	ASTM E3071-22 - Standard Guide for Nanotechnology Workforce Education in Materials Synthesis and Processing	2022-04-15	https://www.astm.org/e3071-22.html	0.0.0.0	1.1 This guide provides a framework for a basic workforce education in materials synthesis and processing at the nanoscale, to be taught at an undergraduate college level. This education should be broad to prepare an individual to serve within one of the many areas in nanotechnology research, development, or manufacturing. 1.2 This guide may be used to develop or evaluate an education program for…
ASTM	Current version	Standard	ASTM E3059-22 - Standard Guide for Workforce Education in Nanotechnology Infrastructure	2022-04-15	https://www.astm.org/e3059-22.html	0.0.0.0	1.1 This document provides guidelines for basic workforce education in the infrastructure topics related to nanotechnology to be taught at an undergraduate college level. This education should be broad to prepare an individual to work within one of the many areas in nanotechnology research, development, or manufacturing. The individual so educated may be involved in material handling, manufacture…
ASTM	Current version	Standard	ASTM E3034-20 - Standard Guide for Workforce Education in Nanotechnology Pattern Generation	2020-11-09	https://www.astm.org/e3034-20.html	0.0.0.0	1.1 This guide provides a framework for a basic workforce education in pattern generation topics related to nanotechnology, to be taught at an undergraduate college level. The education should be broadbased, preparing an individual to work in one of many areas in nanotechnology research, development, or manufacturing. The individual so educated may be involved in nanoscale pattern definition. 1.2…
ASTM	Current version	Standard	ASTM E3001-20 - Standard Practice for Workforce Education in Nanotechnology Characterization	2020-11-09	https://www.astm.org/e3001-20.html	0.0.0.0	1.1 This practice describes a procedure to provide the basic education of characterization methods for nanometer-scale materials, to be taught at an undergraduate college level. This education should be broad and include a suite of characterization methods to prepare an individual to work in various capacities within one of the many areas in nanotechnology research, development, or manufacturing.…
ASTM	Current version	Standard	ASTM E2996-20 - Standard Guide for Workforce Education in Nanotechnology Health and Safety	2020-11-09	https://www.astm.org/e2996-20.html	0.0.0.0	1.1 This guide provides a framework for basic workforce education in health and safety topics related to nanotechnology, to be taught at an undergraduate college level. This education should be broad to prepare an individual to work safely within one of the many areas in nanotechnology research, development, or manufacturing. 1.2 This guide may be used to develop or evaluate an education program …
ASTM	Current version	Standard	ASTM E3171-21a - Standard Test Method for Determination of Total Silver in Textiles by ICP-OES or ICP-MS Analysis	2021-08-06	https://www.astm.org/e3171-21a.html	0.0.1.1	1.1 This test method covers the use of inductively coupled plasma–optical emission spectrometry (ICP-OES) and inductively coupled plasma–mass spectrometry (ICP-MS) analyses for determination of the mass fraction of total silver in consumer textile products made of any combination of natural or manufactured fibers. Either ICP-OES or ICP-MS analysis is recommended as a first step to test for and qu…
ASTM	Current version	Standard	ASTM E3025-22 - Standard Guide for Tiered Approach to Detection and Characterization of Silver Nanomaterials in Textiles	2022-12-12	https://www.astm.org/e3025-22.html	0.0.1.1	1.1 This guide covers the use of a tiered approach for detection and characterization of silver nanomaterials in consumer textile products made of any combination of natural or manufactured fibers. 1.2 This guide covers, but is not limited to, fabrics and parts (for example, thread, batting) used during the manufacture of textiles and production of consumer textile products that may contain silve…
ASTM	Current version	Standard	ASTM E2535-07(2018) - Standard Guide for Handling Unbound Engineered Nanoscale Particles in Occupational Settings	2018-10-16	https://www.astm.org/e2535-07r18.html	0.0.0.0	1.1 This guide describes actions that could be taken by the user to minimize human exposures to unbound, engineered nanoscale particles (UNP) in research, manufacturing, laboratory and other occupational settings where UNP may reasonably be expected to be present. It is intended to provide guidance for controlling such exposures as a cautionary measure where neither relevant exposure standards no…
ASTM	Will be replaced	Standard	ASTM E2526-22 - Standard Test Method for Evaluation of Cytotoxicity of Nanoparticulate Materials in Porcine Kidney Cells and Human Hepatocarcinoma Cells	2022-07-21	https://www.astm.org/e2526-22.html	0.0.0.0	1.1 This test method provides a methodology to assess the cytotoxicity of suspensions of nanoparticulate materials in porcine proximal tubule cells (LLC-PK1) and human hepatocarcinoma cells (Hep G2) which represents potential target organs following systemic administration 1.2 This test method is part of the in vitro preclinical characterization cascade. 1.3 This test method consists of a protoco…
ASTM	Will be replaced	Standard	ASTM E2525-22 - Standard Test Method for Evaluation of the Effect of Nanoparticulate Materials on the Formation of Mouse Granulocyte-Macrophage Colonies	2022-07-21	https://www.astm.org/e2525-22.html	0.0.0.0	1.1 This test method provides a protocol for quantitative analysis of the effect of nanoparticulate materials in physiologic solution on granulocyte-macrophage colony-forming units. 1.2 This test method employs murine bone marrow hematopoietic stem cells which proliferate and differentiate to form discrete cell clusters or colonies which are counted. 1.3 This test method is part of the in vitro p…
ASTM	Will be replaced	Standard	ASTM E2524-22 - Standard Test Method for Analysis of Hemolytic Properties of Nanoparticles	2022-10-04	https://www.astm.org/e2524-22.html	0.0.0.0	1.1 This test method covers assessing the effect of nanoparticulate materials on the integrity of red blood cells. 1.2 This test method uses diluted whole blood incubated with nanoparticulate material and the hemoglobin released from damaged red blood cells is determined. 1.3 This test method is similar to Practice F756 with the volumes reduced to accommodate nanoparticulate material. 1.4 This te…
ASTM	Current version	Standard	ASTM E3247-20 - Standard Test Method for Measuring the Size of Nanoparticles in Aqueous Media Using Dynamic Light Scattering	2020-10-15	https://www.astm.org/e3247-20.html	0.0.0.0	1.1 This test method addresses the determination of nanoparticle size (equivalent sphere hydrodynamic diameter) using batch-mode (off-line) dynamic light scattering (DLS) in aqueous suspensions and establishes general procedures that are applicable to many commercial DLS instruments. This test method specifies best practices, including sample preparation, performance verification, data analysis a…
ASTM	Current version	Standard	ASTM E3143 - 18b - Standard Practice for Performing Cryo-Transmission Electron Microscopy of Liposomes	2019-02-01	https://www.astm.org/e3143-18b.html	0.0.3s.1	1.1 This practice covers procedures for vitrifying and recording images of a suspension of liposomes with a cryo-transmission electron microscope (cryo-TEM) for the purpose of evaluating their shape, size distribution and lamellarity for quality assessment. The sample is vitrified in liquid ethane onto specially prepared holey, ultra-thin, or continuous carbon TEM grids, and imaged in a cryo-hold…
ASTM	Under development	Standard	ASTM WK76878 - New Practice for the analysis of nanoparticle effects on human platelets in vitro	N/A	https://www.astm.org/DATABASE.CART/WORKITEMS/WK76878.htm	0.0.0.0	1.1 This document describes a procedure for analysis of platelet aggregation. 1.2 Platelet aggregation is assessed either using light transmission aggregometry or counting the number of single (un-aggregated) platelets. 1.3 Units - The values stated in SI units are to be regarded as the standard. No other units of measurement are included in this standard. 1.4 This standard does not purport to ad…
ASTM	Under development	Standard	ASTM WK76862 - New Guide for Identification of Nanoparticles Ability to Induce Infusion Reactions	N/A	https://www.astm.org/DATABASE.CART/WORKITEMS/WK76862.htm	0.0.0.0	1.1 This standard will provide guidance on synthesis and the measurement approaches 1.2 The purpose of this document is to provide a guide for applying several standard practices to understand the nanoparticles ability to induce infusion reactions 1.3 Expectations and recommendations for in vitro analysis of nanoparticles ability to activate complement system, induce cytokines and platelet aggreg…
ASTM	Under development	Standard	ASTM WK76823 - New Guide for Evaluation of Immunostimulatory Properties of Nucleic Acid Nanoparticles (NANPs)	N/A	https://www.astm.org/DATABASE.CART/WORKITEMS/WK76823.htm	1.2.2.1	This standard will provide guidance on the synthesis and the measurement approaches . The purpose of this document is to provide a guide for applying several standard practices to understand immunostimulatory properties of nucleic acid nanoparticles (NANPs). Expectations and recommendations for NANPs synthesis and characterization by native-PAGE are discussed. Expectations and recommendations for…
ASTM	Under development	Standard	ASTM WK76822 - New Practice for Preparation and Analysis of Culture Supernatants for the Presence of Cytokine Biomarkers by Nucleic Acid Nanoparticles in Human Peripheral Blood Mononuclear Cells	N/A	https://www.astm.org/DATABASE.CART/WORKITEMS/WK76822.htm	1.2.2.1	This document describes a procedure for purification of human peripheral blood mononuclear cells (PBMC) and their application to determine immunostimulatory activity of Nucleic Acid Nanoparticles (NANPs). PBMCs are purified from freshly donated whole blood of healthy donor volunteers under a protocol approved by the Institutional Review Board (IRB). Safety procedures review and approval by an Ins…
ASTM	Under development	Standard	ASTM WK76861 - New Practice for In vivo analysis of nanoparticle-mediated physiological changes accompanying hypersensitivity reactions	N/A	https://www.astm.org/DATABASE.CART/WORKITEMS/WK76861.htm	0.0.0.0	This practice covers the rationale, features, units, definitions and technical execution of the porcine model of complement activation-related pseudoallergy (CARPA), an in vivo test enabling sensitive and quantitative assessment of non-IgE-mediated Type I (pseudoallergic) hypersensitivity reactions (HSRs) caused by i.v. administered nanoparticulate drugs and agents, commonly referred to as nanome…
ASTM	Under development	Standard	ASTM WK76860 - New Practice for the Preparation and Analysis of Culture Supernatants for the Presence of Cytokine Biomarkers by Nanoparticles in Human Whole Blood Cultures	N/A	https://www.astm.org/DATABASE.CART/WORKITEMS/WK76860.htm	0.0.0.0	1.1This document describes a procedure for preparation of human whole blood cultures 1.2The whole blood cultures are then exposed to controls and nanoparticles, and the supernatants are collected and stored at -20 C or -80C before further analysis 1.2The culture supernatants are next analyzed for the presence of cytokines using single-plex or multi-plex Enzyme-Linked Immunosorbent Assay (ELISA). …
EMA	Current version	Paper	Reflection paper on surface coatings: general issues for consideration regarding parenteral administration of coated nanomedicine products	2013-05-22	https://www.ema.europa.eu/en/documents/scientific-guideline/reflection-paper-surface-coatings-general-issues-consideration-regarding-parenteral-administration_en.pdf	2.3.0.1	General issues to consider during the development of nanomedicine products that include a covalent or non-covalent coating are: • The effect of the coating on the product stability (e.g. polymer-coated liposomes) • The effect of the coating on the product pharmacokinetics and bio-distribution (e.g. polymercoated liposomes) • The effect of the coating (physico-chemical characteristics) on biomolec…
EMA	Current version	Paper	Joint MHLW/EMA reflection paper on the development of block copolymer micelle medicinal products	2013-12-19	https://www.ema.europa.eu/en/documents/scientific-guideline/joint-mhlw/ema-reflection-paper-development-block-copolymer-micelle-medicinal-products_en.pdf	2.3.2.1	This paper provides basic information for the pharmaceutical development, and non-clinical and early clinical studies of block-copolymer micelle drug products created to affect PK, stability and distribution of incorporated or conjugated active substances in vivo. Although the focus is on products designed for intravenous administration, the principles outlined in this reflection paper might also…
EMA	Current version	Paper	Reflection paper on the data requirements for intravenous liposomal products developed with reference to an innovator liposomal product	2013-02-21	https://www.ema.europa.eu/en/documents/scientific-guideline/reflection-paper-data-requirements-intravenous-liposomal-products-developed-reference-innovator_en.pdf	2.3.3s.1	This reflection paper is intended to assist in the generation of relevant quality, non-clinical and clinical data to support a marketing authorisation of intravenous liposomal products developed with reference to an innovator liposomal product. Hence, this document should facilitate a decision on the following issues: (i) pharmaceutical data needed as evidence of product comparability between tes…
EMA	Current version	Paper	Reflection paper on the data requirements for intravenous iron-based nano-colloidal products developed with reference to an innovator medicinal product	2015-03-26	https://www.ema.europa.eu/en/documents/scientific-guideline/reflection-paper-data-requirements-intravenous-iron-based-nano-colloidal-products-developed_en.pdf	1.1.1.1	This reflection paper is intended to assist in the generation of relevant quality, non-clinical and PK clinical comparative data to support a marketing authorisation for an intravenous iron-based nano-colloidal product developed with reference to an innovator product. Hence, this document should facilitate a decision on the following issues: (i) pharmaceutical data needed as evidence of product s…
European Commission	Final	Guideline	Guidance on the safety assessment of nanomaterials in cosmetics.	2019-10-31	https://ec.europa.eu/health/sites/default/files/scientific_committees/consumer_safety/docs/sccs_o_233.pdf	2.0.0.0	This Guidance is an up-to-date revision of the existing Guidance (SCCS/1484/12) and is aimed at providing an overview of the key issues and data requirements relating to the safety assessment of NMs in cosmetics.
European Commission	Final	Report	An overview of concepts and terms used in the European Commission's definition of nanomaterial	2019-02-11	https://publications.jrc.ec.europa.eu/repository/handle/JRC113469	0.0.0.0	This report supports the implementation of the European Commission’s Recommendation on a definition of nanomaterial (2011/696/EU). It addresses its key concepts and terms and discusses them in a regulatory context. Corresponding to the broad scope of the definition the considerations in this report can be applied across all relevant legislative areas; they are not specific to any particular piece…
European Commission	Final	Report	GRACIOUS data logging templates for the environmental, health and safety assessment of nanomaterials	2019-09-27	https://publications.jrc.ec.europa.eu/repository/handle/JRC117733	0.0.0.0	The harmonised recording of experimental data on nanomaterial properties generated in different research projects is a key issue in nanosafety. In 2017, NANoREG published a set of Excel® templates aimed to facilitate the reporting of data on 33 endpoints generated during laboratory work. Each template is based on ISA-TAB-Nano and relates the result of an experiment to the conditions, protocols, m…
European Commission	Final	Report	The NanoDefine Methods Manual	2020-01-28	https://publications.jrc.ec.europa.eu/repository/handle/JRC117501	0.0.0.0	The NanoDefine Methods Manual has been developed within the NanoDefine project 'Development of an integrated approach based on validated and standardized methods to support the implementation of the EC recommendation for a definition of nanomaterial', funded by the European Union's 7th Framework Programme, under grant agreement 604347. The overall goal of the NanoDefine project was to support the…
European Commission	Final	Report	Nano or Not Nano? A Structured Approach for Identifying Nanomaterials According to the European Commission’s Definition	2020-10-27	https://publications.jrc.ec.europa.eu/repository/handle/JRC120405	0.0.0.0	Identifying nanomaterials (NMs) according to European Union legislation is challenging, as there is an enormous variety of materials, with different physico‐chemical properties. The NanoDefiner Framework and its Decision Support Flow Scheme (DSFS) allow choosing the optimal method to measure the particle size distribution by matching the material properties and the performance of the particular m…
European Commission	Final	Report	Nanomaterials: Commission proposes case by case approach to assessment	2012-10-03	https://ec.europa.eu/commission/presscorner/detail/en/MEMO_12_732	0.0.0.0	Details on how nanomaterials are covered by EU legislation such as the chemicals legislation (REACH Regulation)
European Commission	Current version	Paper	Analytical ultracentrifugation for measuring drug distribution of doxorubicin loaded liposomes in human serum	2020-06-09	https://link.springer.com/content/pdf/10.1007/s11051-020-04843-5.pdf	2.3.3s.1	The potential of analytical ultracentrifugation (AUC) in the analysis of the drug distribution of liposomal doxorubicin formulation (with nominal diameter of 85 nm) in the presence of human serum proteins is demonstrated using the absorbance detection function of the instrument. Based on the AUC measurement (and model fitting for molecular mass calculation), we show that in a single experiment, i…
European Commission	Current version	Paper	Efficacy, biocompatibility and degradability of carbon nanoparticles for photothermal therapy of lung cancer	2021-03-17	https://www.futuremedicine.com/doi/pdfplus/10.2217/nnm-2021-0009	1.1.3.1	Aim: To investigate near infrared-induced phototoxicity toward lung cancer cells, and the biodegradability and effect on immune cells of glucose-derived carbon nanoparticles (CNPs). Methods: The human A549 lung adenocarcinoma cell line was used as a model to study the phototoxicity of CNPs. The biodegradability and the effect on immune cells was demonstrated in primary human neutrophils and macro…
European Commission	Final	Guideline	Guidance on the Determination of Potential Health Effects of Nanomaterials Used in Medical Devices	2015-01-06	https://ec.europa.eu/health/scientific_committees/emerging/docs/scenihr_o_045.pdf	0.0.0.0	This Guidance addresses the use of nanomaterials in medical devices and provides information for risk assessors regarding specific aspects that need to be considered in the safety evaluation of nanomaterials. According to the EU Recommendation for the definition of a nanomaterial (Commission Recommendation 2011/696/EU, EC 2011) any particulate substance with at least one dimension in the size ran…
European Commission	Current version	Paper	Risk Assessment of Products of Nanotechnologies	2009-01-19	https://ec.europa.eu/health/ph_risk/committees/04_scenihr/docs/scenihr_o_023.pdf	0.0.0.0	This Opinion deals with the recent developments in the risk assessment of nanomaterials for both man and the environment. The in-depth characterisation of a manufactured nanomaterial on the basis of its physical-chemical characteristics is essential. Due to the size and material specific temporal evolution of some nanomaterials, potentially hazardous nanomaterials need to be characterised both ‘a…
European Commission	Current version	Report	Scientific Basis for the Definition of the Term “nanomaterial”	2010-12-08	https://ec.europa.eu/health/sites/default/files/scientific_committees/emerging/docs/scenihr_o_032.pdf	0.0.0.0	With the expected increase in the applications of nanotechnology, there is an urgent need to identify by clear unequivocal descriptions what can be considered as a nanomaterial and what should not be. This need to identify a nanomaterial comes from the uncertainty regarding the safety evaluation and risk assessment of nanomaterials. The SCENIHR was invited to provide advice on the essential eleme…
European Commission	Current version	Paper	Opinion on Nanosilver: safety, health and environmental effects and role in antimicrobial resistance	2014-06-11	https://ec.europa.eu/health/sites/default/files/scientific_committees/emerging/docs/scenihr_o_039.pdf	1.1.1.1	The characteristics and the use of different forms of silver, including silver salts, silver oxides and silver materials appearing as silver wires, silver particles (Ag-NP) and others, were considered in view of potential human and environmental exposure and health effects. In addition, the use of nanosilver as a biocide in consumer and health-care products was reviewed considering current knowle…
European Commission	Current version	Paper	Opinion on the existing and proposed definitions relating to products of nanotechnologies	2007-11-29	https://ec.europa.eu/health/archive/ph_risk/committees/04_scenihr/docs/scenihr_o_012.pdf	0.0.0.0	The Opinion has established a framework for relevant definitions concerned with nanoscience, nanotechnologies and the products of nanotechnology, based on a sound scientific rationale that emphasises the specific needs for clarity of terminology in relation to risk assessment.
European Commission	Current version	Report	The appropriateness of existing methodologies to assess the potential risks associated with engineered and adventitious products of nanotechnologies	2006-03-10	https://ec.europa.eu/health/archive/ph_risk/committees/04_scenihr/docs/scenihr_o_003b.pdf	0.0.0.0	In view of the growing importance of nanotechnologies, and following from the conclusions of the Council of the European Union on the European strategy for nanotechnologies1 highlighting the importance of the “assessment of potential risks throughout the life cycle of nanotechnologybased products” and the nanotechnologies action plan, the European Commission asked the independent experts of the S…
European Commission	Current version	Paper	Opinion on the appropriateness of the risk assessment methodology in accordance with the technical guidance documents for new and existing substances for assessing the risks of nanomaterials	2007-06-22	https://ec.europa.eu/health/archive/ph_risk/committees/04_scenihr/docs/scenihr_o_010.pdf	0.0.0.0	The Scientific Committee on Emerging and Newly Identified Health Risks of DG Sanco of the European Commission was asked, in the light of current scientific knowledge and in relation to the general information and practices of chemicals risk assessment, to assess the appropriateness of risk assessment methodologies described in the current Technical Guidance Documents of the chemicals legislation …
European Commission	Current version	Paper	Scientific advice on the safety of nanomaterials in cosmetics	2021-03-08	https://ec.europa.eu/health/sites/default/files/scientific_committees/consumer_safety/docs/sccs_o_239.pdf	2.0.0.0	This opinion addresses general aspects of biological safety of commonly used nanomaterials in cosmetics.
European Commission	Final	Paper	Opinion on Copper (nano) and Colloidal Copper (nano)	2021-03-05	https://ec.europa.eu/health/sites/default/files/scientific_committees/consumer_safety/docs/sccs_o_245.pdf	1.1.1.1	This opinion addresses the following questions: in the view of the above, and taking into account the scientific data provided, does the SCCS consider the nanomaterials cooper and colloidal copper safe when used in leave-on and rinse-off dermal and oral cosmetic products including: skin, nail and cuticle, hair and scalp and oral hygiene products, at a maximum concentration of 1% (for both cooper …
European Commission	Final	Paper	Opinion on Hydroxyapatite (nano)	2021-03-31	https://ec.europa.eu/health/sites/default/files/scientific_committees/consumer_safety/docs/sccs_o_246.pdf	2.(1,2).1.1	This opinion addresses the following questions: In view of the above, and taking into account the scientific data provided, does the SCCS consider the nanomaterial Hydroxyapatite safe when used in leave-on and rinse-off dermal and oral cosmetic products according to the maximum concentrations and specifications reported in the attached list, taking into account reasonably foreseeable exposure con…
European Commission	Current version	Paper	Opinion on Platinum (nano)	2021-06-25	https://ec.europa.eu/health/sites/default/files/scientific_committees/consumer_safety/docs/sccs_o_252.pdf	0.0.1.1	This opinion addresses the following questions: n view of the above, and taking into account the scientific data provided, does the SCCS consider the nanomaterials A (Platinum and Colloidal Platinum ) and B (Acetyl tetrapeptide-17 (and) Colloidal Platinum) are safe when used in leave-on cosmetic products according to the maximum concentrations and specifications reported in the attached list, tak…
European Commission	Final	Paper	Opinion on Gold (nano)	2021-06-25	https://ec.europa.eu/health/sites/default/files/scientific_committees/consumer_safety/docs/sccs_o_251.pdf	0.0.1.1	This opinion addresses the following questions: In view of the above, and taking into account the scientific data provided, does the SCCS consider the nanomaterials Gold and Colloidal Gold, Gold Thioethylamino Hyaluronic Acid and Acetyl heptapeptide-9 Colloidal gold are safe when used in leave-on skin cosmetic products according to the maximum concentrations and specifications, taking into accoun…
European Commission	Current version	Paper	Second revision of the opinion on carbon black, nano-form	2015-12-15	https://ec.europa.eu/health/sites/default/files/scientific_committees/consumer_safety/docs/sccs_o_144.pdf	0.0.3.1	The present dossier evaluates the safety of Carbon Black/CI 77266 taking into account most recent recommendations for the safety evaluation of nanomaterials.
European Commission	Current version	Paper	Revision of the opinion on Silica, Hydrated Silica, and Silica Surface Modified with Alkyl Silylates (nano form)	2015-09-29	https://ec.europa.eu/health/sites/default/files/scientific_committees/consumer_safety/docs/sccs_o_175.pdf	2.(1,2).1.0	The SCCS is requested to give its opinion on the safety of the nanomaterials Silica, Hydrated Silica, Silica Silylate and Silica Dimethyl Silylate for use in leave-on and rinse-off cosmetics products, including hair, skin, lip, face, and nail products, taking into account the reasonably foreseeable exposure conditions.
European Commission	Final	Paper	Opinion on Titanium Dioxide (nano form) as UV-Filter in sprays	2018-01-19	https://ec.europa.eu/health/sites/default/files/scientific_committees/consumer_safety/docs/sccs_o_206.pdf	2.1.1.0	The SCCS is requested to give its opinion on the safety of the nanomaterial Titanium Dioxide (nano) when used as UV-Filter in sunscreens and personal care spray products.
European Commission	Final	Paper	Opinion on Styrene/Acrylates copolymer (nano) and Sodium styrene/Acrylates copolymer (nano)	2018-06-22	https://ec.europa.eu/health/sites/default/files/scientific_committees/consumer_safety/docs/sccs_o_218.pdf	0.0.2.0	The SCCS is requested to give its opinion on the safety of the nanomaterial Styrene/acrylates copolymer and Sodium styrene/Acrylates copolymer when used in leave-on cosmetics products with a maximum concentration limit of 0.06%, taking into account the reasonably foreseeable exposure conditions.
European Commission	Final	Paper	Opinion on Colloidal Silver (nano)	2018-10-25	https://ec.europa.eu/health/sites/default/files/scientific_committees/consumer_safety/docs/sccs_o_219.pdf	1.1.1.1	The SCCS is requested to give its opinion on the safety of the nanomaterial Colloidal Silver when used in cosmetics including toothpastes and skin care products with a maximum concentration limit of 1%, taking into account the reasonably foreseeable exposure conditions.
European Commission	Current version	Legislative document	Commission Recommendation of 10 June 2022 on the definition of nanomaterial (Text with EEA relevance) 2022/C 229/01	2011-10-18	https://eur-lex.europa.eu/legal-content/EN/TXT/?uri=CELEX%3A32022H0614%2801%29	0.0.0.0	’Nanomaterial’ means a natural, incidental or manufactured material consisting of solid particles that are present, either on their own or as identifiable constituent particles in aggregates or agglomerates, and where 50 % or more of these particles in the number-based size distribution fulfil at least one of the following conditions: (a) one or more external dimensions of the particle are in the…
European Commission	Withdrawn	Legislative document	COMMISSION RECOMMENDATION of 18 October 2011 on the definition of nanomaterial	2011-10-18	https://eur-lex.europa.eu/LexUriServ/LexUriServ.do?uri=OJ:L:2011:275:0038:0040:en:PDF#:~:text=A%20nanomaterial%20as%20defined%20in,between%201%20nm%2D100%20nm.&text=The%20definition%20in%20this%20Recommendation%20should%20therefore%20also%20include%20particles,range%201%20nm%2D100%20nm.	0.0.0.0	Nanomaterial is a natural, incidental or manufactured material containing particles, in an unbound state or as an aggregate or as an agglomerate and where, for 50% or more of the particles in the number size distribution, one or more external dimensions is in the size range 1 nm–100 nm. In specific cases and where warranted by concerns for the environment, health, safety or competitiveness the nu…
European Commission	Current version	Legislative document	Regulation (EU) No 528/2012 of the European Parliament and of the Council of 22 May 2012 concerning the making available on the market and use of biocidal products	2012-05-22	https://eur-lex.europa.eu/legal-content/EN/TXT/?uri=celex%3A32012R0528	0.0.0.0	Nanomaterial means a natural or manufactured active substance or non-active substance containing particles, in an unbound state or as an aggregate or as an agglomerate and where, for 50% or more of the particles in the number size distribution, one or more external dimensions is in the size range 1–100 nm. Fullerenes, graphene flakes and single wall carbon nanotubes with one or more external dime…
European Commission	Current version	Legislative document	Regulation (EU) 2015/2283 of the European Parliament and of the Council of 25 November 2015 on novel foods, amending Regulation (EU) No 1169/2011 of the European Parliament and of the Council and repealing Regulation (EC) No 258/97 of the European Parliament and of the Council and Commission Regulation (EC) No 1852/2001	2015-11-25	https://eur-lex.europa.eu/legal-content/EN/ALL/?uri=celex:32015R2283	0.0.0.0	Engineered nanomaterial means any intentionally produced material that has one or more dimensions of the order of 100 nm or less or that is composed of discrete functional parts, either internally or at the surface, many of which have one or more dimensions of the order of 100 nm or less, including structures, agglomerates or aggregates, which may have a size above the order of 100 nm but retain …
European Commission	Current version	Legislative document	Regulation (EC) No 1223/2009 of the European Parliament and of the Council of 30 November 2009 on cosmetic products	2009-11-30	https://eur-lex.europa.eu/legal-content/EN/ALL/?uri=CELEX%3A32009R1223	2.0.0.0	Nanomaterial is an insoluble or biopersistent and intentionally manufactured material with one or more external dimensions, or an internal structure, on the scale from 1 to 100 nm.
European Commission	Final	Other	Successful European nanotechnology research	2011-08-02	https://op.europa.eu/en/publication-detail/-/publication/d3be015e-672c-4d74-ae55-454b5ca7f810/language-en/format-PDF/source-search	0.0.0.0	In order to think ever bigger, you have to go ever smaller. Science today is looking for the key to greater achievements by turning its full attention to the manipulation of structures in the order of a few millionths of a millimetre, the nano domain. However, this new industrial revolution implies the mastery of an intricate web of interdisciplinary connections, as demonstrated throughout the re…
European Commission	Final	Other	Nanotechnology - The invisible giant tackling Europe's future challenges	2013-06-11	https://op.europa.eu/en/publication-detail/-/publication/e5bb7290-f4a2-49cd-9cb2-f45dbbad58b8	0.0.0.0	This publication describes the unique nature of nanotechnology, bringing innovation to every aspect of human existence. The publication outlines nanoscience and nanotechnology dedicated research expenditure in Europe over recent years, in particular via the 7th research framework programme (FP7). An overview is given of the main sectors where nanotechnology is enabling significant progress. It hi…
European Commission	Current version	Other	Checklists for Applicants submitting dossiers on Cosmetic Ingredients to be evaluated by the SCCS	2018-05-16	https://ec.europa.eu/health/sites/default/files/scientific_committees/consumer_safety/docs/sccs_o_210.pdf	2.0.0.0	This document provides checklists for the parameters that are essential for the SCCS evaluation of cosmetic ingredients, including nanomaterials in cosmetics. The main purpose of these checklists is to enable both the Applicant and the SCCS to quickly assess if the dossiers are complete and to prevent submissions that are incomplete or contain inadequate/irrelevant data. This should streamline th…
European Commission	Final	Paper	Anticipation of regulatory needs for nanotechnology-enabled health products	2019	https://publications.jrc.ec.europa.eu/repository/handle/JRC118190	0.0.0.0	Development of nanotechnology-based applications in health sector offer innovative therapeutic and diagnostic opportunities to address medical needs. At the moment, no specific regulatory framework exists for nano-enabled health products and the current regulatory practise might require additional guidance in order to fully cover the particularities of such products. This white paper summarizes t…
European Commission	Final	Report	The JRC Nanomaterials Repository - Safe handling of nanomaterials in the sub-sampling facility	2016	https://publications.jrc.ec.europa.eu/repository/handle/JRC104369	0.0.0.0	The present report describes the set-up of this novel facility, with emphasis on Occupational Health & Safety aspects. It illustrates the complete workflow that leads to the production of those vials that are distributed worldwide as benchmark nanomaterials.
European Commission	Final	Report	NM-Series of Representative Manufactured Nanomaterials - Zinc Oxide NM-110, NM-111, NM-112, NM-113: Characterisation and Test Item Preparation	2011	https://publications.jrc.ec.europa.eu/repository/handle/JRC64075	2.0.1.0	The present report describes the characterisation of NM-110, NM-111, NM-112, and NM-113, RMN Zinc Oxide substances, originating from defined batches of commercially manufactured material, respectively.
European Commission	Final	Report	Titanium Dioxide, NM-100, NM-101, NM-102, NM-103, NM-104, NM-105: Characterisation and Physico-Chemical Properties	2014	https://publications.jrc.ec.europa.eu/repository/handle/JRC86291	2.0.1.0	The present report presents the physico-chemical characterisation of the Titanium dioxide series from the JRC repository: NM-100, NM-101, NM-102, NM-103, NM-104 and NM-105. NM-105 was selected as principal material for the OECD test programme "Testing a representative set of manufactured nanomaterials".
European Commission	Final	Report	Synthetic Amorphous Silicon Dioxide (NM-200, NM-201, NM-202, NM-203, NM-204): Characterisation and Physico-Chemical Properties	2013	https://publications.jrc.ec.europa.eu/repository/handle/JRC83506	2.0.1.0	The present report presents the physico-chemical characterisation of the synthetic amorphous silicon dioxide (SiO2, SAS) from the JRC repository: NM-200, NM-201, NM-202, NM-203 and NM-204. NM-200 was selected as principal material for the OECD test programme "Testing a representative set of manufactured nanomaterials". NM-200, NM-201 and NM-204 (precipitated SAS) are produced via the precipitatio…
European Commission	Final	Report	Multi-walled Carbon Nanotubes, NM-400, NM-401, NM-402, NM-403: Characterisation and Physico-Chemical Properties	2014	https://publications.jrc.ec.europa.eu/repository/handle/JRC91205	0.0.3.0	The present report presents the physico-chemical characterisation of the multi-walled carbon nanotubes (MWCNT) from the JRC Repository: NM-400, NM-401, NM-402 and NM-403. NM-400 was selected as principal material for the OECD WPMN testing programme. They are produced by catalytic chemical vapour deposition. Each of these NMs originates from one respective batch of commercially manufactured MWCNT.…
European Commission	Final	Report	Cerium Dioxide, NM-211, NM-212, NM-213. Characterisation and test item preparation	2014	https://publications.jrc.ec.europa.eu/repository/handle/JRC89825	2.0.1.0	The present report presents the physico-chemical characterisation of the manufactured nano cerium dioxide, NM-211 and NM212 from the JRC repository, both originating from a single batch of commercially manufactured material. In addition data on a bulk (i.e. macro-sized) CeO2, NM-213, is included, which also originates from a single batch; NM-213 is not in the JRC repository
European Commission	Final	Other	JRC NANOMATERIALS REPOSITORY - List of Representative Nanomaterials	June/2016	https://joint-research-centre.ec.europa.eu/system/files/2016-06/JRC%2520Nanomaterials%2520Repository-List%2520of%2520Representative%2520Nanomaterials-201606.pdf	0.0.0.0	The table below provides a list of the nanomaterials (NMs) hosted in the JRC Nanomaterials Repository and their main physico-chemical characteristics. Measurements to determine the primary particle size, the particle size distribution, the average length (CNT) and diameter were performed by TEM (unless specified otherwise); the specific surface area was determined via gas sorption analysis (BET m…
FDA	Final	Report	Nanotechnology—Over a Decade of Progress and Innovation	July 2020	https://www.fda.gov/media/140395/download	0.0.0.0	This report highlights FDA’s advancements in the field of nanotechnology since it released its last report in 2007, and its role in advancing the public health through its regulation of products within its jurisdiction that involve the application of nanotechnology. Moving forward, FDA will continue to: • monitor scientific and technological advancements and convergence of emerging technologies w…
FDA	Final	Guideline	Drug Products, Including Biological Products, that Contain Nanomaterials	April 2022	https://www.fda.gov/media/157812/download	0.0.0.0	This document provides guidance on the development of human drug products, including those that are biological products, in which a nanomaterial (as explained in this section) is present in the finished dosage form.
FDA	Final	Guideline	Guidance for Industry. Use of Nanomaterials in Food for Animal	August 2015	https://www.fda.gov/media/88828/download	0.0.0.0	In this document, the term animal food means food for animals. This guidance is applicable to food ingredients that are intended for use in animal food and that (1) consist entirely of nanomaterials, (2) contain nanomaterials as a component, or (3) otherwise involve the application of nanotechnology.
FDA	Final	Guideline	Guidance for Industry: Safety of Nanomaterials in Cosmetic Products	June 2014	https://www.fda.gov/regulatory-information/search-fda-guidance-documents/guidance-industry-safety-nanomaterials-cosmetic-products	0.0.0.0	This document provides guidance to industry and other stakeholders (e.g., academia, other regulatory groups) on FDA’s current thinking on the safety assessment of nanomaterials in cosmetic products. The guidance document is intended to assist industry and other stakeholders in identifying the potential safety issues of nanomaterials in cosmetic products and developing a framework for evaluating t…
FDA	Final	Guideline	Liposome Drug Products: Chemisty, Manufacturing, and Controls; Human Pharmacokinetics and Bioavailability; and Labeling Documentation	April 2018	https://www.fda.gov/media/70837/download	2.3.3s.1	This guidance discusses what types of information you, the applicant, should submit in your new drug application (NDA) or abbreviated new drug application (ANDA) for a liposome drug product reviewed by the Center for Drug Evaluation and Research (CDER). The discussion addresses the following topics for liposome drug products: (A) chemistry, manufacturing, and controls (CMC); (B) human pharmacokin…
FDA	Final	Guideline	Considering Whether an FDA-Regulated Product Involves the Application of Nanotechnology	June 2014	https://www.fda.gov/regulatory-information/search-fda-guidance-documents/considering-whether-fda-regulated-product-involves-application-nanotechnology	0.0.0.0	The guidance describes FDA’s current thinking on determining whether FDA-regulated products involve the application of nanotechnology. This guidance provides an overarching framework for FDA’s approach to the regulation of nanotechnology products. It identifies two points to consider when determining whether the FDA-regulated product involves the application of nanotechnology. An affirmative find…
ISO	Current version	Standard	ISO/TS 10689:2023 Nanotechnologies — Superhydrophobic surfaces and coatings: Characteristics and performance assessmen	August 2023	https://www.iso.org/standard/83744.html?browse=tc	0.0.0.0	This document specifies requirements and recommendations for performance assessment methods for superhydrophobic surfaces and coatings subjected to mechanical stress, solar radiation and weathering, liquids, and thermal cycling, where applicable, based on the agreement between interested parties. The performance assessment is carried out based on comparative measurements of the advancing and rece…
ISO	Will be replaced	Standard	ISO/TS 21361:2019 - Nanotechnologies — Method to quantify air concentrations of carbon black and amorphous silica in the nanoparticle size range in a mixed dust manufacturing environment	April 2019	https://www.iso.org/standard/70760.html	0.0.(1.3).0	This document provides guidelines to quantify and identify air concentration (number of particles/cm3) of particles of carbon black and/or amorphous silica by size in air samples collected in a mixed dust industrial manufacturing environment. The method is defined for air samples collected with an electrical low pressure cascade impactor (ELPCI). on a 25 mm polycarbonate substrate. The method is …
ISO	Will be replaced	Standard	ISO/TS 80004-12:2016 - Nanotechnologies — Vocabulary — Part 12: Quantum phenomena in nanotechnology	April 2016	https://www.iso.org/standard/63095.html	0.0.0.0	ISO/TS 80004-12:2016 lists terms and definitions relevant to quantum phenomena in nanotechnologies. All of these terms are important for nanotechnologies, but it is to be noted that many of them are not exclusively relevant to the nanoscale and can also be used to some extent to refer to larger scales. The list of terms presented does not claim to provide exhaustive coverage of the whole spectrum…
ISO	Under revision	Standard	ISO/AWI TS 80004-12 - Nanotechnologies — Vocabulary — Part 12: Quantum phenomena in nanotechnology	N/A	https://www.iso.org/standard/86096.html	0.0.0.0	ISO/AWI TS 80004-12 lists terms and definitions relevant to quantum phenomena in nanotechnologies. All of these terms are important for nanotechnologies, but it is to be noted that many of them are not exclusively relevant to the nanoscale and can also be used to some extent to refer to larger scales. The list of terms presented does not claim to provide exhaustive coverage of the whole spectrum …
ISO	Under revision	Standard	ISO/AWI TS 21361 - Nanotechnologies — Method to quantify air concentrations of carbon black and amorphous silica in the nanoparticle size range in a mixed dust manufacturing environment	N/A	https://www.iso.org/standard/86097.html	0.0.(1,3).0	This document provides guidelines to quantify and identify air concentration (number of particles/cm3) of particles of carbon black and/or amorphous silica by size in air samples collected in a mixed dust industrial manufacturing environment. The method is defined for air samples collected with an electrical low pressure cascade impactor (ELPCI). on a 25 mm polycarbonate substrate. The method is …
ISO	Withdrawn	Standard	ISO/TS 80004-1:2015 - Nanotechnologies — Vocabulary — Part 1: Core terms	December 2015	https://www.iso.org/standard/68058.html?browse=tc	0.0.0.0	ISO/TS 80004-1:2015 lists terms and definitions related to core terms in the field of nanotechnologies. It is intended to facilitate communications between organizations and individuals in industry and those who interact with them.
ISO	Current version	Standard	ISO 80004-1:2023 - Nanotechnologies — Vocabulary — Part 1: Core terms	July 2023	https://www.iso.org/standard/79525.html?browse=tc	0.0.0.0	ISO/TS 80004-1:2015 lists terms and definitions related to core terms in the field of nanotechnologies. It is intended to facilitate communications between organizations and individuals in industry and those who interact with them.
ISO	Will be replaced	Standard	ISO/TS 19590:2017 - Nanotechnologies — Size distribution and concentration of inorganic nanoparticles in aqueous media via single particle inductively coupled plasma mass spectrometry	March 2017	https://www.iso.org/standard/65419.html?browse=tc	0.0.0.0	ISO/TS 19590:2017 specifies a method for the detection of nanoparticles in aqueous suspensions and characterization of the particle number and particle mass concentration and the number-based size distribution using ICP-MS in a time-resolved mode to determine the mass of individual nanoparticles and ionic concentrations. The method is applicable for the determination of the size of inorganic nano…
ISO	Will be replaced	Standard	ISO/TR 18196:2016 - Nanotechnologies — Measurement technique matrix for the characterization of nano-objects	November 2016	https://www.iso.org/standard/61734.html?browse=tc	0.0.0.0	ISO/TR 18196:2016 provides a matrix that guides users to commercially available techniques relevant to the measurements of common physiochemical parameters for nano-objects. Some techniques are also applicable to nanostructured materials.
ISO	Will be replaced	Standard	ISO/TS 12901-2:2014 - Nanotechnologies — Occupational risk management applied to engineered nanomaterials — Part 2: Use of the control banding approach	January 2014	https://www.iso.org/standard/53375.html?browse=tc	0.0.0.0	ISO/TS 12901-2:2014 describes the use of a control banding approach for controlling the risks associated with occupational exposures to nano-objects, and their aggregates and agglomerates greater than 100 nm (NOAA), even if knowledge regarding their toxicity and quantitative exposure estimations is limited or lacking. The ultimate purpose of control banding is to control exposure in order to prev…
ISO	Will be replaced	Standard	ISO/TS 12901-1:2012 - Nanotechnologies — Occupational risk management applied to engineered nanomaterials — Part 1: Principles and approaches	November 2012	https://www.iso.org/standard/52125.html?browse=tc	0.0.0.0	ISO/TS 12901:2012 provides guidance on occupational health and safety measures relating to engineered nanomaterials, including the use of engineering controls and appropriate personal protective equipment, guidance on dealing with spills and accidental releases, and guidance on appropriate handling of these materials during disposal. ISO/TS 12901:2012 is intended for use by competent personnel, s…
ISO	Will be replaced	Standard	ISO/TS 19807-2:2021 - Nanotechnologies — Magnetic nanomaterials — Part 2: Specification of characteristics and measurement methods for nanostructured magnetic beads for nucleic acid extraction	October 2021	https://www.iso.org/standard/73840.html?browse=tc	2.2.1.1	This document specifies characteristics to be measured of magnetic beads in suspension and powder forms for nucleic acid extraction applications. This document deals with magnetic beads that contain a substantial amount of magnetic nanoparticles (which can be superparamagnetic). Potential applicable measurement methods are listed for the individual characteristics. Specifically, this document lis…
ISO	Under revision	Standard	ISO/AWI TR 18196 - Nanotechnologies — Measurement technique matrix for the characterization of nano-objects	N/A	https://www.iso.org/standard/84618.html?browse=tc	0.0.0.0	ISO/TR 18196:2016 provides a matrix that guides users to commercially available techniques relevant to the measurements of common physiochemical parameters for nano-objects. Some techniques are also applicable to nanostructured materials.
ISO	Under revision	Standard	ISO/CD TS 13329 - Nanomaterials — Preparation of material safety data sheet (MSDS)	N/A	https://www.iso.org/standard/83654.html?browse=tc	0.0.0.0	ISO/TR 13329:2012 provides guidance on the development of content for, and consistency in, the communication of information on safety, health and environmental matters in safety data sheets (SDS) for substances classified as manufactured nanomaterials and for chemical products containing manufactured nanomaterials. It provides supplemental guidance to ISO 11014:2009 on the preparation of SDSs gen…
ISO	Under development	Standard	ISO/AWI TS 23879 - Nanotechnologies - Structural characterization of graphene oxide flakes: thickness and lateral size measurement using AFM and SEM	N/A	https://www.iso.org/standard/84861.html?browse=tc	0.0.3.0	This document describes methods for measuring the lateral size and thickness of graphene oxide (GO) flakes using scanning electron microscopy (SEM) and atomic force microscopy (AFM) respectively, including sample pre-treatments, measurement procedures and data analysis. It is applicable to the characterization of graphene oxide in powder and liquid dispersion forms.
ISO	Under development	Standard	ISO/AWI TS 9651 - Nanotechnologies — Classification framework for graphene‐related 2D materials	N/A	https://www.iso.org/standard/84232.html?browse=tc	0.0.3.0	This document recommends and describes a transparent method and range of values for classifying and comparing forms of graphene-related 2D materials (GR2M) regardless of production method or feedstock materials. This document also provides the basis for material technical data sheets which provide a framework which can be used equally by producers, users, and regulators. The described technical d…
ISO	Under development	Standard	ISO/AWI TS 5341 - Nanotechnologies - Nomenclature - Part 1: General nomenclature	N/A	https://www.iso.org/standard/81128.html?browse=tc	0.0.0.0	This document gives guidance and a uniform system for the use of the prefix “nano” and core terms as descriptive modifiers for the field of nanotechnologies, to reduce the need for new term definitions.
ISO	Under development	Standard	ISO/AWI TS 23359 - Nanotechnologies - Chemical characterization of graphene in powders and suspensions.	N/A	https://www.iso.org/standard/83450.html?browse=tc	0.0.3.0	The document describes methods for characterising the chemical properties of powders or liquid dispersions containing graphene-related two-dimensional materials, using a set of suitable measurement techniques. The techniques detailed are X-ray photoelectron spectroscopy (XPS), inductively coupled plasma mass spectrometry (ICP-MS), thermogravimetric analysis (TGA) and Fourier-transform infrared sp…
ISO	Under development	Standard	ISO/AWI TS 21356-2 - Nanotechnologies — Structural characterization of graphene — Part 2: Chemical vapour deposition (CVD) grown graphene	N/A	https://www.iso.org/standard/83449.html?browse=tc	0.0.3.0	This document details the methods for characterising the structural properties of CVD-grown graphene. The methods used are optical microscopy, Raman spectroscopy and transmission electron microscopy (TEM). The properties determined are the percentage of substrate coverage of graphene, number of layers, the level of disorder and layer stacking. Sample preparation routines, measurement protocols an…
ISO	Will be replaced	Standard	ISO 19430:2016 - Particle size analysis — Particle tracking analysis (PTA) method	December 2016	https://www.iso.org/standard/64890.html	0.0.0.0	ISO 19430:2016 describes the evaluation of the number?based particle size distribution in liquid dispersions (solid, liquid or gaseous particles suspended in liquids) using the particle tracking analysis method for diffusion velocity measurements.
ISO	Will be replaced	Standard	ISO 13318-1:2001 - Determination of particle size distribution by centrifugal liquid sedimentation methods — Part 1: General principles and guidelines	March 2001	https://www.iso.org/standard/21704.html	0.0.0.0	Not available
ISO	Will be replaced	Standard	ISO 22412:2017 - Particle size analysis — Dynamic light scattering (DLS)	February 2017	https://www.iso.org/standard/65410.html	0.0.0.0	ISO 22412:2017 specifies the application of dynamic light scattering (DLS) to the measurement of average hydrodynamic particle size and the measurement of the size distribution of mainly submicrometre-sized particles, emulsions or fine bubbles dispersed in liquids. DLS is also referred to as "quasi-elastic light scattering (QELS)" and "photon correlation spectroscopy (PCS)," although PCS actually…
ISO	Current version	Standard	ISO 17867:2020 - Particle size analysis — Small angle X-ray scattering (SAXS)	October 2020	https://www.iso.org/standard/69213.html	0.0.0.0	This document specifies a method for the application of small-angle X-ray scattering (SAXS) to the estimation of mean particle sizes in the 1 nm to 100 nm size range. It is applicable in dilute dispersions where the interaction and scattering effects between the particles are negligible. This document describes several data evaluation methods: the Guinier approximation, model-based data fitting, …
ISO	Current version	Standard	ISO 13318-3:2004 - Determination of particle size distribution by centrifugal liquid sedimentation methods — Part 3: Centrifugal X-ray method	July 2004	https://www.iso.org/standard/31503.html	0.0.0.0	ISO 13318-3:2004 describes a method for determining the particle size distributions of homogeneous particulate material using centrifugal sedimentation in a liquid. Solids concentrations are determined by the attenuation of an X-ray beam. The resulting signal enables conversion to a particle size distribution. The method of determining the particle size distribution described in this standard is …
ISO	Current version	Standard	ISO 13318-2:2007 - Determination of particle size distribution by centrifugal liquid sedimentation methods — Part 2: Photocentrifuge method	September 2007	https://www.iso.org/standard/45771.html	0.0.0.0	ISO 13318-2:2007 covers methods for determining the particle size distribution of particulate materials by means of centrifugal sedimentation in a liquid. Solids concentrations are determined by the transmission of a light beam. The resulting signal enables conversion to a particle size distribution. The method of determining the particle size distribution described in ISO 13318-2:2007 is applica…
ISO	Current version	Standard	ISO 13099-3:2014 - Colloidal systems — Methods for zeta potential determination — Part 3: Acoustic methods	July 2014	https://www.iso.org/standard/52833.html	0.0.0.1	ISO 13099-3:2014 describes in general electroacoustic effects that can be defined as high frequency electrokinetic phenomena. Particular attention is given to two methods of measurement of electrophoretic mobility of particles suspended in a liquid at high concentration above 1 % v/v, colloid vibration current (CVI) and electric sonic amplitude (ESA), respectively. Estimation of surface charge an…
ISO	Will be replaced	Standard	ISO 13099-2:2012 - Colloidal systems — Methods for zeta-potential determination — Part 2: Optical methods	June 2012	https://www.iso.org/standard/52832.html	0.0.0.1	This part of ISO 13099 specifies two methods of measurement of electrophoretic mobility of particles suspended in a liquid: video microscopy and electrophoretic light-scattering. Estimation of surface charge and determination of zeta-potential can be achieved from measured electrophoretic mobility using proper theoretical models, which are described in detail in ISO 13099-1.
ISO	Current version	Standard	ISO 13099-1:2012 - Colloidal systems — Methods for zeta-potential determination — Part 1: Electroacoustic and electrokinetic phenomena	June 2012	https://www.iso.org/standard/52807.html	0.0.0.1	This part of ISO 13099 describes methods of zeta-potential determination, both electric and acoustic, in heterogeneous systems, such as dispersions, emulsions, porous bodies with liquid dispersion medium. There is no restriction on the value of zeta-potential or the mass fraction of the dispersed phase; both diluted and concentrated systems are included. Particle size and pore size is assumed to …
ISO	Withdrawn	Standard	ISO 9277:2010 - Determination of the specific surface area of solids by gas adsorption — BET method	September 2010	https://www.iso.org/obp/ui/es/#iso:std:iso:9277:ed-2:v1:en	0.0.0.0	This International Standard specifies the determination of the overall (see Note) specific external and internal surface area of disperse (e.g. nano-powders) or porous solids by measuring the amount of physically adsorbed gas according to the Brunauer, Emmett and Teller (BET) method (see Reference [1]). It takes account of the International Union for Pure and Applied Chemistry (IUPAC) recommendat…
ISO	Current version	Standard	ISO/TR 13097:2013 - Guidelines for the characterization of dispersion stability	June 2013	https://www.iso.org/standard/52802.html	0.0.0.0	ISO/TR 13097:2013 addresses the stability characterization of liquid dispersions (suspensions, emulsions, foams and mixtures thereof) for applications, such as new product design, optimization of existing products, quality control during processing and during usage of the product. The stability of a dispersion in the sense of ISO/TR 13097:2013 is defined in terms of the change in one or more phys…
ISO	Current version	Standard	ISO/TR 14187:2020 - Surface chemical analysis — Characterization of nanostructured materials	June 2020	https://www.iso.org/standard/74820.html	0.0.0.0	This document provides an introduction to (and some examples of) the types of information that can be obtained about nanostructured materials using surface-analysis tools (Clause 5). Of equal importance, both general issues or challenges associated with characterizing nanostructured materials and the specific opportunities or challenges associated with individual methods are identified (Clause 6)…
ISO	Current version	Standard	ISO/TR 10993-22:2017 - Biological evaluation of medical devices — Part 22: Guidance on nanomaterials	July 2017	https://www.iso.org/standard/65918.html	0.0.0.0	ISO/TR 10993-22:2017 describes considerations for the biological evaluation of medical devices that are composed of or contain nanomaterials. In addition, this guidance can also be used for the evaluation of nano-objects generated as products of degradation, wear, or from mechanical treatment processes (e.g. in situ grinding, polishing of medical devices) from (components of) medical devices that…
ISO	Current version	Standard	ISO/TS 80004-6:2021 - Nanotechnologies — Vocabulary — Part 6: Nano-object characterization	March 2021	https://www.iso.org/standard/74665.html?browse=tc	0.0.0.0	This document defines terms related to the characterization of nano-objects in the field of nanotechnologies. It is intended to facilitate communication between organizations and individuals in research, industry and other interested parties and those who interact with them.
ISO	Current version	Standard	ISO/TS 80004-5:2011 - Nanotechnologies — Vocabulary — Part 5: Nano/bio interface	December 2011	https://www.iso.org/standard/51767.html?browse=tc	0.0.0.0	ISO/TS 80004-5:2011 lists terms and definitions related to the interface between nanomaterials and biology. It is intended to facilitate communications between scientists, engineers, technologists, designers, manufacturers, regulators, NGOs, consumer organizations, members of the public and others with an interest in: - the application or use of nanotechnologies in biology or biotechnology; - the…
ISO	Current version	Standard	ISO/TS 80004-4:2011 - Nanotechnologies — Vocabulary — Part 4: Nanostructured materials	December 2011	https://www.iso.org/standard/52195.html?browse=tc	0.0.0.0	ISO/TS 80004-4:2011 gives terms and definitions for materials in the field of nanotechnologies where one or more components are nanoscale regions and the materials exhibit properties attributable to the presence of those nanoscale regions. It is intended to facilitate communications between organizations and individuals in industry and those who interact with them. Materials classified as nanostr…
ISO	Current version	Standard	ISO/TS 80004-3:2020 - Nanotechnologies — Vocabulary — Part 3: Carbon nano-objects	November 2020	https://www.iso.org/standard/75335.html?browse=tc	0.0.3.0	This document defines terms related to carbon nano-objects in the field of nanotechnologies. It is intended to facilitate communication between organizations' and individuals' research, industry and other interested parties and those who interact with them. Additional terms and definitions for graphene and two-dimensional materials (2D) materials are provided in ISO/TS 80004-13. Related carbon na…
ISO	Current version	Standard	ISO/TS 80004-2:2015 - Nanotechnologies — Vocabulary — Part 2: Nano-objects	June 2015	https://www.iso.org/standard/54440.html?browse=tc	0.0.0.0	ISO/TS 80004-2:2015 lists terms and definitions related to particles in the field of nanotechnologies.
ISO	Current version	Standard	ISO/TR 19601:2017 - Nanotechnologies — Aerosol generation for air exposure studies of nano-objects and their aggregates and agglomerates (NOAA)	July 2017	https://www.iso.org/standard/65451.html?browse=tc	0.0.0.0	ISO/TR 19601:2017 describes methods for producing aerosols of nano-objects and their aggregates and agglomerates (NOAA) for in vivo and in vitro air exposure studies. The purpose of ISO/TR 19601:2017 is to aid in selecting an appropriate aerosol generator to fulfil a proposed toxicology study design. ISO/TR 19601:2017 describes characteristics of aerosol generation methods, including their advant…
ISO	Current version	Standard	ISO/TS 18827:2017 - Nanotechnologies — Electron spin resonance (ESR) as a method for measuring reactive oxygen species (ROS) generated by metal oxide nanomaterials	June 2017	https://www.iso.org/standard/63502.html?browse=tc	0.0.1.0	ISO/TS 18827:2017 provides a procedure for the detection of ROS (OH, O2-, 1O2) generated by metal oxide nanomaterials in aqueous solution with a reactive oxygen species-specific spin trapping agent using ESR, but excludes ESR procedures that do not use a spin trapping agent.
ISO	Current version	Standard	ISO/TR 18637:2016 - Nanotechnologies — Overview of available frameworks for the development of occupational exposure limits and bands for nano-objects and their aggregates and agglomerates (NOAAs)	December 2016	https://www.iso.org/standard/63096.html?browse=tc	0.0.0.0	ISO/TR 16837:2016 provides an overview of available methods and procedures for the development of occupational exposure limits (OELs) and occupational exposure bands (OEBs) for manufactured nano-objects and their aggregates and agglomerates (NOAAs) for use in occupational health risk management decision-making.
ISO	Current version	Standard	ISO/TR 18401:2017 - Nanotechnologies — Plain language explanation of selected terms from the ISO/IEC 80004 series	June 2017	https://www.iso.org/standard/62384.html?browse=tc	0.0.0.0	ISO/TR 18401:2017 is intended to assist stakeholders who are making decisions about the direction, management and application of nanotechnologies to better understand selected key terms and definitions in the ISO/IEC 80004 vocabulary series for nanotechnologies.
ISO	Current version	Standard	ISO/TS 18110:2015 - Nanotechnologies — Vocabularies for science, technology and innovation indicators	December 2015	https://www.iso.org/standard/61482.html?browse=tc	0.0.0.0	ISO/TS 18110:2015 aims to provide the necessary definitions that specify the bounds of key innovation indicators as they relate to nanotechnology, in order to facilitate and unify the global assessment of nanotechnology activities in different areas. The availability of these terms can help the measurement and comparison of various indicators in this field. This Technical Specification does not i…
ISO	Current version	Standard	ISO/TS 17466:2015 - Use of UV-Vis absorption spectroscopy in the characterization of cadmium chalcogenide colloidal quantum dots	August 2015	https://www.iso.org/standard/59853.html?browse=tc	0.0.1.1	ISO/TS 17466:2015 provides guidelines for estimating the diameter and the number concentration of monodisperse cadmium chalcogenide (CdTe, CdSe, CdS) quantum dots (QDs) with a narrow size distribution in a colloidal dispersion using Ultraviolet-visible (UV-Vis) absorption spectroscopy. The analysis of the spheroidal particle size is applicable to the diameter range of 3,5 nm to 9 nm for CdTe, 1 n…
ISO	Current version	Standard	ISO/TR 17302:2015 - Nanotechnologies — Framework for identifying vocabulary development for nanotechnology applications in human healthcare	December 2015	https://www.iso.org/standard/59542.html?browse=tc	0.0.0.0	ISO/TR 17302:2015 will not attempt a formal, comprehensive definition of "nanomedicine". Instead, it will provide a taxonomic framework for the development of vocabulary for clinical applications of nanotechnologies in human healthcare. While it is understood that the origins of nanotechnologies for healthcare applications emerge from pre-clinical and translational research, the interest of this …
ISO	Current version	Standard	ISO 17200:2020 - Nanotechnology — Nanoparticles in powder form — Characteristics and measurements	September 2020	https://www.iso.org/standard/73132.html?browse=tc	0.0.0.0	This document specifies the fundamental characteristics to be measured of a sample of engineered nanoparticles in powder form to determine the size, the chemical content and the surface area. This document also specifies measurement methods for determining each of the characteristics. It is intended to facilitate communication among consumers, regulators and industries with the necessary characte…
ISO	Current version	Standard	ISO/TS 16550:2014 - Nanotechnologies — Determination of silver nanoparticles potency by release of muramic acid from Staphylococcus aureus	May 2014	https://www.iso.org/standard/57084.html?browse=tc	1.1.1.1	ISO/TS 16550:2014 provides a test method for evaluating potency of silver nanoparticles to cell wall degradation of Staphylococcus aureus and muramic acid release as quantified by a gas chromatography-mass spectrometry (GC-MS).
ISO	Current version	Standard	ISO/TR 16196:2016 - Nanotechnologies — Compilation and description of sample preparation and dosing methods for engineered and manufactured nanomaterials	October 2016	https://www.iso.org/standard/55826.html?browse=tc	0.0.0.0	ISO/TR 16196:2016 provides guidance regarding the preparation of nanomaterials for eco- and bio- toxicological testing. It provides guidance regarding factors pertaining to sample preparation and dose determination that might be useful in toxicological, including ecotoxicological, testing of engineered and manufactured nanoscale materials. The descriptions of sample preparation method factors for…
ISO	Current version	Standard	ISO/TS 16195:2018 - Nanotechnologies — Specification for developing representative test materials consisting of nano-objects in dry powder form	December 2018	https://www.iso.org/standard/73130.html?browse=tc	0.0.0.0	This document specifies development of representative test materials consisting of nano-objects in dry powder form, to enable test method development and improve comparability of data for nanotechnology applications. It includes the physico-chemical properties (specifically, size and shape, specific surface area, crystal structure, and bulk chemical composition) that are required to be measured a…
ISO	Current version	Standard	ISO/TR 14786:2014 - Nanotechnologies — Considerations for the development of chemical nomenclature for selected nano-objects	February 2014	https://www.iso.org/standard/55039.html?browse=tc	0.0.0.0	ISO/TR 14786:2014 is intended to provide information and analyses in support of the development of chemical nomenclature for the naming of "nano-objects". "Nano-objects" have been defined in ISO/TS 80004‑1:2010 to mean "materials with one, two, or three external dimensions in the nanoscale", with the nanoscale defined as the "size range from approximately 1 nm to 100 nm". Nano-objects are further…
ISO	Current version	Standard	ISO/TS 13830:2013 - Nanotechnologies — Guidance on voluntary labelling for consumer products containing manufactured nano-objects	December 2013	https://www.iso.org/standard/54315.html?browse=tc	0.0.0.0	ISO/TS 13830:2013 provides guidance on the content of voluntary labels for consumer products containing manufactured nano-objects.
ISO	Current version	Standard	ISO/TR 13121:2011 - Nanotechnologies — Nanomaterial risk evaluation	May 2011	https://www.iso.org/standard/52976.html?browse=tc	0.0.0.0	ISO/TR 13121:2011 describes a process for identifying, evaluating, addressing, making decisions about, and communicating the potential risks of developing and using manufactured nanomaterials, in order to protect the health and safety of the public, consumers, workers and the environment. ISO/TR 13121:2011 offers guidance on the information needed to make sound risk evaluations and risk managemen…
ISO	Current version	Standard	ISO/TR 13014:2012 - Nanotechnologies — Guidance on physico-chemical characterization of engineered nanoscale materials for toxicologic assessment	May 2012	https://www.iso.org/standard/52334.html?browse=tc	0.0.0.0	This Technical Report provides guidance for the physico-chemical characterization of manufactured nano-objects and their aggregates and agglomerates (NOAA) greater than 100 nm presented for toxicological testing in order to aid in assessing and interpreting the toxicological impact of manufactured nano-objects and to allow the material under test to be differentiated from seemingly similar materi…
ISO	Current version	Standard	ISO/TR 12885:2018 - Nanotechnologies — Health and safety practices in occupational settings	December 2018	https://www.iso.org/standard/67446.html?browse=tc	0.0.0.0	This document describes health and safety practices in occupational settings relevant to nanotechnologies. This document focuses on the occupational manufacture and use of manufactured nano-objects, and their aggregates and agglomerates greater than 100 nm (NOAAs). It does not address health and safety issues or practices associated with NOAAs generated by natural processes, hot processes and oth…
ISO	Current version	Standard	ISO/TS 12805:2011 - Nanotechnologies — Materials specifications — Guidance on specifying nano-objects	November 2011	https://www.iso.org/standard/51766.html?browse=tc	0.0.0.0	ISO/TS 12805:2011 provides guidance on the preparation of specifications for the characteristics of manufactured nano-objects and their measurement methods. This is intended to help ensure the delivery of products with consistent properties for subsequent processing and/or final product performance. ISO/TS 12805:2011 includes guidance on specifying the physical and chemical characteristics of man…
ISO	Current version	Standard	ISO/TR 12802:2010 - Nanotechnologies — Model taxonomic framework for use in developing vocabularies — Core concepts	November 2010	https://www.iso.org/standard/51765.html?browse=tc	0.0.0.0	ISO/TR 12802:2010 establishes core concepts for nanotechnology in a model taxonomic framework. It is intended to facilitate communication and promote common understanding.
ISO	Current version	Standard	ISO/TS 12025:2021 - Nanomaterials — Quantification of nano-object release from powders by generation of aerosols	May 2021	https://www.iso.org/standard/73131.html?browse=tc	0.0.0.0	This document describes methods for the quantification of nano-object release from powders as a result of treatment, ranging from handling to high energy dispersion, by measuring aerosols liberated after a defined aerosolization procedure. Particle number concentration and size distribution of the aerosol are measured and the mass concentration is derived. This document provides information on fa…
ISO	Current version	Standard	ISO/TS 11937:2012 - Nanotechnologies — Nanoscale titanium dioxide in powder form — Characteristics and measurement	December 2012	https://www.iso.org/standard/52827.html?browse=tc	0.0.1.0	ISO/TS 11937 provides requirements to describe the basic characteristics of titanium dioxide in powder form relevant for applications in nanotechnology. It is intended to detail the materials specification necessary to use titanium dioxide in the applications related to nanotechonology. It is limited to dry powders and does not include materials dispersed or suspended in water or solvents. It doe…
ISO	Current version	Standard	ISO/TS 11931:2012 - Nanotechnologies — Nanoscale calcium carbonate in powder form — Characteristics and measurement	December 2012	https://www.iso.org/standard/52825.html?browse=tc	0.0.1.0	ISO/TS 11931:2012 provides requirements to describe the basic characteristics of nanoscale calcium carbonate in powder form relevant for applications in nanotechnology. It is intended to detail the material specification necessary to use CaCO3 in the applications related to nanotechnology. It does not cover characteristics specific for health and safety issues, and for specific applications of na…
ISO	Current version	Standard	ISO/TS 11888:2017 - Nanotechnologies — Characterization of multiwall carbon nanotubes — Mesoscopic shape factors	July 2017	https://www.iso.org/standard/69549.html?browse=tc	0.0.3.0	ISO/TS 11888:2017 describes methods for the characterization of mesoscopic shape factors of multiwall carbon nanotubes (MWCNTs). Techniques employed include scanning electron microscopy (SEM), transmission electron microscopy (TEM), viscometry, and light scattering analysis. ISO/TS 11888:2017 also includes additional terms needed to define the characterization of static bending persistence length…
ISO	Current version	Standard	ISO/TR 11811:2012 - Nanotechnologies — Guidance on methods for nano- and microtribology measurements	August 2012	https://www.iso.org/standard/50835.html?browse=tc	0.0.0.0	ISO/TR 11811:2012 establishes techniques for the evaluation of tribological performance of sliding contacts with a lateral size of between a few nanometres and 10 µm, and where the applied load is between 50 µN and 100 mN. It describes procedures for undertaking these measurements, and provides guidance on the effect of parameters on test results. It does not cover existing SPM techniques, such a…
ISO	Current version	Standard	ISO/TR 11360:2010 - Nanotechnologies — Methodology for the classification and categorization of nanomaterials	July - 2010	https://www.iso.org/standard/55967.html?browse=tc	0.0.0.0	ISO/TR 11360:2010 describes a classifying system, termed a “nano-tree”, upon whose basis wide ranges of nanomaterials can be categorized, including nano-objects, nanostructures and nanocomposites of various dimensionality of different physical, chemical, magnetic and biological properties.
ISO	Current version	Standard	ISO/TS 11308:2020 - Nanotechnologies — Characterization of carbon nanotube samples using thermogravimetric analysis	April 2020	https://www.iso.org/standard/69548.html?browse=tc	0.0.3.0	This document gives guidelines for the characterization of carbon nanotube (CNT)-containing samples by thermogravimetric analysis (TGA), performed in either an inert or oxidizing environment. Guidance is provided on the purity assessment of the CNT samples through a quantitative measure of the types of carbon species present as well as the non-carbon impurities (e.g. metal catalyst particles) wit…
ISO	Current version	Standard	ISO/TS 11251:2019 - Nanotechnologies — Characterization of volatile components in single-wall carbon nanotube samples using evolved gas analysis/gas chromatograph-mass spectrometry	September 2019	https://www.iso.org/standard/75337.html?browse=tc	0.0.3.0	This document specifies a method for the characterization of evolved gas components in single-wall carbon nanotube (SWCNT) samples using evolved gas analysis/gas chromatograph mass spectrometry (EGA/GCMS). NOTE Some difference could appear between qualitative and quantitative results of emitted gas and gas content in the sample due to the heating and the possible presence of catalysts.
ISO	Current version	Standard	ISO/TR 10929:2012 - Nanotechnologies — Characterization of multiwall carbon nanotube (MWCNT) samples	January 2012	https://www.iso.org/standard/46424.html?browse=tc	0.0.3.0	ISO/TR 10929:2012 identifies the basic properties of multiwall carbon nanotubes (MWCNTs) and the content of impurities, which characterize bulk samples of MWCNTs, and highlights the major measurement methods available to industry for the determination of these parameters. ISO/TR 10929:2012 provides a sound basis for the research, development and commercialization of these materials.
ISO	Current version	Standard	ISO/TS 10868:2017 - Nanotechnologies — Characterization of single-wall carbon nanotubes using ultraviolet-visible-near infrared (UV-Vis-NIR) absorption spectroscopy	May 2017	https://www.iso.org/standard/69547.html?browse=tc	0.0.3.0	ISO/TS 10868:2017 provides guidelines for the characterization of compounds containing single-wall carbon nanotubes (SWCNTs) by using optical absorption spectroscopy. The aim of this document is to describe a measurement method to characterize the diameter, the purity, and the ratio of metallic SWCNTs to the total SWCNT content in the sample. The analysis of the nanotube diameter is applicable fo…
ISO	Current version	Standard	ISO/TS 10867:2019 - Nanotechnologies — Characterization of single-wall carbon nanotubes using near infrared photoluminescence spectroscopy	December 2019	https://www.iso.org/standard/75336.html?browse=tc	0.0.3.0	This document gives guidelines for the characterization of single-wall carbon nanotubes (SWCNTs) using near infrared (NIR) photoluminescence (PL) spectroscopy. It provides a measurement method for the determination of the chiral indices of the semi-conducting SWCNTs in a sample and their relative integrated PL intensities. The method can be expanded to estimate the relative mass concentrations of…
ISO	Current version	Standard	ISO 10808:2010 - Nanotechnologies — Characterization of nanoparticles in inhalation exposure chambers for inhalation toxicity testing	December 2010	https://www.iso.org/standard/46130.html?browse=tc	0.0.0.0	ISO 10808:2010 specifies requirements for, and gives guidance on, the characterization of airborne nanoparticles in inhalation exposure chambers for the purpose of inhalation toxicity studies in terms of particle mass, size distribution, number concentration and composition.
ISO	Current version	Standard	ISO 10801:2010 - Nanotechnologies — Generation of metal nanoparticles for inhalation toxicity testing using the evaporation/condensation method	December 2012	https://www.iso.org/standard/46129.html?browse=tc	0.0.1.2	ISO 10801:2010 gives requirements and recommendations for generating metal nanoparticles as aerosols suitable for inhalation toxicity testing by the evaporation/condensation method. Its application is limited to metals such as gold and silver which have been proven to generate nanoparticles suitable for inhalation toxicity testing using the technique specified.
ISO	Current version	Standard	ISO/TS 10798:2011 - Nanotechnologies — Charaterization of single-wall carbon nanotubes using scanning electron microscopy and energy dispersive X-ray spectrometry analysis	July 2011	https://www.iso.org/standard/46128.html?browse=tc	0.0.3.0	ISO/TS 10798:2011 establishes methods to characterize the morphology, and to identify the elemental composition of catalysts and other inorganic impurities in raw and purified single-wall carbon nanotube (SWCNT) powders and films, using scanning electron microscopy and energy dispersive X-ray spectrometry analysis. The methods described in ISO/TS 10798:2011 for SWCNTs can also be applied to the a…
ISO	Current version	Standard	ISO/TS 10797:2012 - Nanotechnologies — Characterization of single-wall carbon nanotubes using transmission electron microscopy	June 2012	https://www.iso.org/standard/46127.html?browse=tc	0.0.3.0	ISO/TS 10797:2012 establishes methods for characterizing the morphology of single-wall carbon nanotubes (SWCNTs) and identifying the elemental composition of other materials in SWCNT samples, using transmission electron microscopy and chemical analysis by energy dispersive X-ray spectrometry.
ISO	Will be replaced	Standard	ISO/TS 21362:2018 - Nanotechnologies — Analysis of nano-objects using asymmetrical-flow and centrifugal field-flow fractionation	June 2018	https://www.iso.org/standard/70761.html?browse=tc	0.0.0.0	This document identifies parameters and conditions, as part of an integrated measurement system, necessary to develop and validate methods for the application of asymmetrical-flow and centrifugal field-flow fractionation to the analysis of nano-objects and their aggregates and agglomerates dispersed in aqueous media. In addition to constituent fractionation, analysis can include size, size distri…
ISO	Withdrawn	Standard	ISO/TS 20477:2017 - Nanotechnologies — Standard terms and their definition for cellulose nanomaterial	October 2017	https://www.iso.org/standard/68153.html?browse=tc	0.0.3.1	ISO/TS 20477:2017 defines terms and definitions for different types of cellulose nanomaterials including secondary components found in cellulose nanomaterials due to their manufacturing processes. The document also gives information on cellulose micromaterials in Annex A. Where necessary, terms from the ISO/IEC 80004 vocabulary series are included in this document. Terms in this document are appl…
ISO	Will be replaced	Standard	ISO/TS 80004-13:2017 - Nanotechnologies — Vocabulary — Part 13: Graphene and related two-dimensional (2D) materials	September 2017	https://www.iso.org/standard/64741.html?browse=tc	0.0.3.0	ISO/TS 80004-13:2017 lists terms and definitions for graphene and related two-dimensional (2D) materials, and includes related terms naming production methods, properties and their characterization. It is intended to facilitate communication between organizations and individuals in research, industry and other interested parties and those who interact with them.
ISO	Will be replaced	Standard	ISO/TR 13329:2012 - Nanomaterials — Preparation of material safety data sheet (MSDS)	December 2012	https://www.iso.org/standard/53705.html?browse=tc	0.0.0.0	ISO/TR 13329:2012 provides guidance on the development of content for, and consistency in, the communication of information on safety, health and environmental matters in safety data sheets (SDS) for substances classified as manufactured nanomaterials and for chemical products containing manufactured nanomaterials. It provides supplemental guidance to ISO 11014:2009 on the preparation of SDSs gen…
ISO	Under revision	Standard	ISO 80004-1 - Nanotechnologies – Vocabulary — Part 1: Core terms and definitions	N/A	https://www.iso.org/standard/79525.html?browse=tc	0.0.0.0	This part of ISO 80004 series lists terms and definitions related to core terms in the field of nanotechnologies. It is intended to facilitate communications between organizations and individuals in industry and those who interact with them.
ISO	Under revision	Standard	ISO/CD TS 80004-13 - Nanotechnologies — Vocabulary — Part 13: Graphene and related two-dimensional (2D) materials	N/A	https://www.iso.org/standard/82855.html?browse=tc	0.0.3.0	ISO/TS 80004-13:2017 lists terms and definitions for graphene and related two-dimensional (2D) materials, and includes related terms naming production methods, properties and their characterization. It is intended to facilitate communication between organizations and individuals in research, industry and other interested parties and those who interact with them.
ISO	Under revision	Standard	ISO/AWI 21362 - Nanotechnologies — Analysis of nano-objects using asymmetrical-flow and centrifugal field-flow fractionation	N/A	https://www.iso.org/standard/78427.html?browse=tc	0.0.0.0	This Technical Specification identifies parameters and conditions, as part of an integrated measurement system, necessary to develop and validate methods for the application of asymmetrical flow and centrifugal field-flow fractionation to the analysis of nano-objects and their aggregates and agglomerates dispersed in aqueous media. In addition to constituent fractionation, analysis may include si…
ISO	Under revision	Standard	ISO/DTS 19807-2 - Nanotechnologies — Magnetic nanomaterials — Part 2: Specification of characteristics and measurement methods for nanostructured magnetic beads for nucleic acid extraction	N/A	https://www.iso.org/standard/73840.html?browse=tc	2.2v.1.1	This Technical Specification (TS) specifies characteristics of magnetic beads in suspension and powder forms for nucleic acid extraction applications. Magnetic beads, as described in this document, contain a substantial amount of superparamagnetic nanoparticles which contribute significantly to the stability of the suspension in the absence of an external magnetic field, because in this case the …
ISO	Under revision	Standard	ISO/WD TS 19590 - Nanotechnologies — Size distribution and concentration of inorganic nanoparticles in aqueous media via single particle inductively coupled plasma mass spectrometry	N/A	https://www.iso.org/standard/82209.html?browse=tc	0.0.1.0	This ISO/NP TS 19590 specifies a method for the detection and characterisation of nanoparticles in aqueous suspensions, specified here as the particle number and particle mass concentration and the number-based size distribution using ICP-MS in a time-resolved mode to determine the mass of individual nanoparticles. The method is applicable for the determination of the size of inorganic nanopartic…
ISO	Under revision	Standard	ISO/WD TS 12901-2 - Nanotechnologies — Occupational risk management applied to engineered nanomaterials — Part 2: Use of the control banding approach	N/A	https://www.iso.org/standard/82791.html?browse=tc	0.0.0.0	This Technical Speficication provides a conceptual framework for occupational risk management applied to engineered nanomaterials based on a "control banding approach" for controlling exposures in the presence of a number of uncertainties. All requirements of this International technical specification are generic and are intended to be applicable to all organizations dealling with nanomaterials, …
ISO	Under revision	Standard	ISO/CD TS 12901-1 - Nanotechnologies — Occupational risk management applied to engineered nanomaterials — Part 1: Principles and approaches	N/A	https://www.iso.org/standard/80582.html?browse=tc	0.0.0.0	This Part of ISO 12901 specifies guidance on occupational health and safety measures, including the use of engineering controls and appropriate personal protective equipment, guidance on dealing with spills and accidental releases, and guidance on appropriate handling of these materials during disposal. This technical specification is intended for use by competent personnel, such as health and sa…
ISO	Under development	Standard	IEC/CD 62565-3-1 - Nanomanufacturing — Material specifications — Part 3-1: Graphene — Blank detail specification	N/A	https://www.iso.org/standard/66782.html?browse=tc	0.0.3.0	This Standard establishes a blank detail specification for essential electrical and certain other characteristics including optical, dimensional, and mechanical properties of graphene relevant for the functionality, durability and reliability of the final nano-enabled product(s). This Standard provides a standardized format for detail specifications characterising essential basic properties of gr…
ISO	Under development	Standard	ISO/PRF TS 24672 - Nanotechnologies — Guidance on the measurement of nanoparticle number concentration	N/A	https://www.iso.org/standard/79369.html?browse=tc	0.0.0.0	This Technical Report provides an overview of methods used to determine the nanoparticle number concentration in liquid dispersions and aerosols. The methods described are the ensemble measurement techniques of centrifugal liquid sedimentation (CLS), multi-angle dynamic light scattering (MDLS), small angle X-ray scattering (SAXS) and ultra violet-visible spectroscopy (UV-vis) and the particle cou…
ISO	Under development	Standard	ISO/WD TS 23878 - Nanotechnologies — Positron annihilation lifetime measurement for nanopore evaluation in materials	N/A	https://www.iso.org/standard/77259.html?browse=tc	0.0.0.0	This document describes a method for performing positron annihilation lifetime measurements with a 22Na positron source with beta-plus decay to analyze the lifetime of positrons as a mean lifetime of the ortho-positronium from 1 ns to 10 ns (ascribed to the pore size, approximately, from 0.3 nm to 1.3 nm in diameter), observed for polymeric materials in which the positronium atoms mostly annihila…
ISO	Current version	Standard	ISO/TS 23690:2023 - Nanotechnologies — Multiwall carbon nanotubes — Determination of amorphous carbon content by thermogravimetric analysis	July 2023	https://www.iso.org/standard/76660.html?browse=tc	0.0.3.0	This document specifies a method to determine amorphous carbon content in multiwall carbon nanotube (MWCNT) samples by thermogravimetric analysis (TGA) under carbon dioxide atmosphere. It was developed for characterization of amorphous carbon content in MWCNT samples prepared by chemical vapour deposition (CVD). Measurement of amorphous carbon in MWCNT samples prepared by other method can refer t…
ISO	Under development	Standard	ISO/CD TR 23652 -Nanotechnologies — Considerations for radiolabelling methods of nanomaterials for performance evaluation	N/A	https://www.iso.org/standard/76540.html?browse=tc	0.0.0.0	Not available
ISO	Under development	Standard	ISO/WD TS 23361 - Nanotechnologies — Crystallinity of cellulose nanomaterials by powder X-ray diffraction (Ruland-Rietveld analysis)	N/A	https://www.iso.org/standard/75317.html?browse=tc	0.0.3.1	This document specifies the determination of the bulk crystallinity (crystalline contribution relative to the total crystalline and amorphous contributions in the material) of cellulose nanomaterials using powder X-ray diffraction followed by deconvolution of the diffraction patterns based on Rietveld analysis. It is applicable to all types of cellulose nanomaterial.
ISO	Under development	Standard	ISO/WD TS 22298 - Nanotechnologies — Silica nanomaterials — Specifications of characteristics and measurement methods for nanostructured porous silica samples with ordered nanopore array	N/A	https://www.iso.org/standard/80980.html?browse=tc	0.0.1.0	This document specifies characteristics to be measured and their measurement methods of silica samples with ordered nanopore array in powder form. The pore sizes of a sample range from subnanometers to several tens of nanometers. This document excludes silica-gel and fumed silica from a viewpoint of their distinct properties and applications
ISO	Under development	Standard	ISO/WD TR 5387 - Nanotechnologies: Lung burden measurement of nanomaterials for inhalation toxicity studies	N/A	https://www.iso.org/standard/81226.html?browse=tc	0.0.0.0	Not available
ISO	Current version	Standard	ISO/TS 4971:2023 - Nanotechnologies — Performance evaluation of nanosuspensions containing clay nanoplates for quorum quenching	June 2023	https://www.iso.org/standard/80540.html?browse=tc	2.0.1.0	This document specifies the performance evaluation of nanosuspension containing clay nanoplates for quorum quenching in crop production. This document does not cover safety and environmental aspects.
ISO	Under development	Standard	ISO/CD TS 4958 - Nanotechnologies — Liposomes terminology	N/A	https://www.iso.org/standard/80535.html?browse=tc	2.3.3s.1	This part of ISO/TS 80004 lists terms and definitions related to liposomes in the field of nanotechnologies. It is intended to facilitate communications between organizations and individuals, including academic researchers, industry, regulatory agencies and other interested parties and those who interact with them. Additional terms and definitions that relate to the nano/bio interface and nanotec…
ISO	Current version	Standard	ISO/TS 20477:2023 - Nanotechnologies — Standard terms and their definition for cellulose nanomaterial	2023-05-01	https://www.iso.org/standard/83010.html?browse=tc	0.0.3.1	ISO/TS 20477:2017 defines terms and definitions for different types of cellulose nanomaterials including secondary components found in cellulose nanomaterials due to their manufacturing processes. The document also gives information on cellulose micromaterials in Annex A. Where necessary, terms from the ISO/IEC 80004 vocabulary series are included in this document. Terms in this document are appl…
ISO	Current version	Standard	ISO/TS 23650:2021 -Nanotechnologies — Evaluation of the antimicrobial performance of textiles containing manufactured nanomaterials	October 2021	https://www.iso.org/standard/76539.html?browse=tc	1.2.0.0	This TS specifies the antimicrobial performance assessment method of textiles containing manufactured nanomaterials (TCMNMs) (metals/metal oxides). The textiles in this document include fabric, yarn and fibre in which manufactured nanomaterials are used during production or finishing process. Further, it also specifies protocols to determine the amount of nanomaterials released from textile follo…
ISO	Current version	Standard	ISO/TR 23463:2022 - Nanotechnologies — Characterization of carbon nanotube and carbon nanofiber aerosols in relation to inhalation toxicity tests	May 2022	https://www.iso.org/standard/75639.html?browse=tc	0.0.3.0	This technical report reviews characterisation of CNT and CNF aerosols for inhalation exposure studies. The technical report also provides useful information on appropriate characterisation of CNT and CNF, which is required to evaluate and understand the inhalation toxicity of CNT and CNF aerosols. This technical report neither provides guidance on aerosol characterisation for other carbon nanoma…
ISO	Current version	Standard	ISO/TS 23367-1:2022 - Nanotechnologies — Performance characteristics of nanosensors for chemical and biomolecule detection - Part 1: Detection performance	December 2022	https://www.iso.org/standard/77396.html?browse=tc	2.1.0.0	This document describes the performance characteristics necessary for the detecting performance evaluation of a nanosensors for chemical and biomolecule detection. This document does not cover the analytical performance characteristics nor the performance evaluation procedure of a specific sensor.
ISO	Current version	Standard	ISO/TS 23366:2023 - Nanotechnologies — Performance evaluation requirements for quantifying biomolecules using fluorescent nanoparticles in immunohistochemistry	May 2023	https://www.iso.org/standard/75346.html?browse=tc	0.0.0.0	This document describes minimum requirements for performance evaluation of applying fluorescent nanoparticles in quantitative immuno-histochemistry.
ISO	Current version	Standard	ISO/TS 23302:2021 - Nanotechnologies — Requirements and recommendations for the identification of measurands that characterise nano-objects and materials that contain them	November 2021	https://www.iso.org/standard/75190.html?browse=tc	0.0.0.0	This Technical Specification provides guidelines for the identification of measurands to characterize nano-objects, and their agglomerates and aggregates and to assess specific properties relevant to the performance of materials that contain them. It provides guidance for relevant measurement.
ISO	Current version	Standard	ISO/TS 23151:2021 - Nanotechnologies — Particle size distribution for cellulose nanocrystals	September 2021	https://www.iso.org/standard/74742.html?browse=tc	0.0.3.1	This document describes methods for the measurement of particle size distributions for cellulose nanocrystals using atomic force microscopy and transmission electron microscopy. The document provides a protocol for the reproducible dispersion of the material using ultrasonication, as assessed using dynamic light scattering. Sample preparation for microscopy, image acquisition and data analysis ar…
ISO	Current version	Standard	ISO/TS 23034:2021 - Nanotechnologies — Method to estimate cellular uptake of carbon nanomaterials using optical absorption	August 2021	https://www.iso.org/standard/74368.html?browse=tc	0.0.3.0	This technical specification describes a near-infrared optical absorption method to estimate the in vitro cellular uptake of carbon nanomaterials including both internalized and/or tightly adhered to the cell membrane from liquid dispersions. This is a simple method to screen carbon nanomaterials uptake; additional analysis using a different technique maybe required if quantification is desired.
ISO	Current version	Standard	ISO/DTR 22455:2021 - Nanotechnologies - High throughput screening method for nanoparticles toxicity using 3D model cells	November 2021	https://www.iso.org/standard/73244.html?browse=tc	0.0.0.0	The purpose of this document is to propose a method for high throughput evaluation of cytotoxic response of 3D model cells exposed to NPs without optical interference. The methods in this proposal are intended to be used in biological testing laboratories that are competent in the culture and growth of cells and the evaluation of cytotoxicity of NPs using 3D-model cells. The described method appl…
ISO	Current version	Standard	ISO/TR 22293:2021 - Evaluation of methods for assessing the release of nanomaterials from commercial, nanomaterial-containing polymer composites	July 2021	https://www.iso.org/standard/73049.html?browse=tc	0.0.0.0	This document reviews and evaluates the utility of available methods to assess material released from commercial polymer composites in support of product use and safety decisions, and describes what revised or additional methods are needed. The document is not focused on describing methods per se; rather the goal is to describe information that should be considered in selecting methods to support…
ISO	Current version	Standard	ISO/TS 21633:2021 - Label-free impedance technology to assess the toxicity of nanomaterials in vitro	August 2021	https://www.iso.org/standard/71295.html?browse=tc	0.0.0.0	This Technical Specification describes a methodology of a label free and real-time detection for noninvasive monitoring of cell based assays to assess toxicity of nanomaterials to eukaryotic and prokaryotic cells.
ISO	Current version	Standard	ISO/TS 21357:2022 - Nanotechnologies — Evaluation of the mean size of nano-objects in liquid dispersions by static multiple light scattering (SMLS)	January 2022	https://www.iso.org/standard/70759.html?browse=tc	0.0.0.0	This Technical Specification provides guidance for the determination of the mean (spherical) equivalent diameter of nano-objects (i.e. particles, droplets or bubbles) dispersed in liquids using the static multiple light scattering (SMLS) technique. The technique is applicable to a wide range of materials and does not require dilution of concentrated samples.
ISO	Current version	Standard	ISO/TS 5094:2023 - Nanotechnologies — Assessment of peroxidase-like activity of metal and metal oxide nanoparticles	February 2023	https://www.iso.org/standard/80771.html?browse=tc	0.0.1.0	This document specifies a method for measuring the peroxidase-like activity of metal and metal oxide nanoparticles. The document is applicable for the measurement and assessment of peroxidase-like activity of metal and metal oxide nanoparticles by spectrophotometer. The document can be referred in the measurement for peroxidase-like activity of other kinds of nanoparticles.
ISO	Current version	Standard	ISO/TS 4988:2022 - Nanotechnologies — Bioavailability assessment of manufactured nanomaterials in an aquatic environment using Tetrahymena sp.	2022-05-01	https://www.iso.org/standard/80595.html?browse=tc	0.0.0.0	This test specification specifies a method, aiming to maximize repeatability and reliability of bioavailability or toxicity assessment of MNMs to Tetrahymena sp. Here, the amount of test particle is calculated both in mass weight and surface area, used in MNMs manner in the cell culture due to varying size of MNMs to elucidate the mode of action of these MNMs in this model eukaryotic organism. Th…
ISO	Current version	Standard	ISO/TS 80004-11:2017 - Nanotechnologies — Vocabulary — Part 11: Nanolayer, nanocoating, nanofilm, and related terms	2017-05-01	https://www.iso.org/standard/63253.html?browse=tc	0.0.0.0	ISO/TS 80004-11:2017 lists terms and definitions, and specifies an extensible taxonomic terminology framework for nanolayers, nanocoatings, nanofilms, and related terms in the field of nanotechnologies.
ISO	Current version	Standard	IEC/TS 80004-9:2017 - Nanotechnologies — Vocabulary — Part 9: Nano-enabled electrotechnical products and systems	January 2017	https://www.iso.org/standard/62945.html?browse=tc	0.0.0.0	IEC TS 80004-9: 2017(E) specifies terms and definitions for electrotechnical products and systems reliant on nanomaterials for their essential functionalities. It is intended to facilitate communications between organizations and individuals in industry and those who interact with them.
ISO	Current version	Standard	ISO/TS 80004-8:2020 - Nanotechnologies — Vocabulary — Part 8: Nanomanufacturing processes	November 2020	https://www.iso.org/standard/74666.html?browse=tc	0.0.0.0	This document defines terms related to nanomanufacturing processes in the field of nanotechnologies. All the process terms in this document are relevant to nanomanufacturing, however, many of the listed processes are not exclusively relevant to the nanoscale. Terms that are not exclusive are noted within the definitions. Depending on controllable conditions, such processes can result in material …
ISO	Current version	Standard	ISO/TS 80004-7:2011 - Nanotechnologies — Vocabulary — Part 7: Diagnostics and therapeutics for healthcare	October 2011	https://www.iso.org/standard/51962.html?browse=tc	0.0.0.0	ISO/TS 80004-7:2011 is applicable to the use of nanotechnologies in medical diagnostics and therapeutics. Terms relating to the applications of nanotechnology in healthcare might also be addressed in other parts of ISO/TS 80004 and in other documents. Terms relating to the exploitation of material features at the nanoscale for diagnostic or therapeutic purposes in relation to human disease come w…
ISO	Current version	Standard	IEC/TR 63258:2021 - Nanotechnologies — A guideline for ellipsometry application to evaluate the thickness of nanoscale films	March 2021	https://www.iso.org/standard/75422.html?browse=tc	2.0.0.0	IEC TR 63258:2021 is a Technical Report focused on the practical protocol of ellipsometry to evaluate the thickness of nanoscale films. This document does not include any specification of the ellipsometers, but suggests how to minimize the data variation to improve data reproducibility.
ISO	Current version	Standard	IEC/TS 62622:2012 - Artificial gratings used in nanotechnology — Description and measurement of dimensional quality parameters	October 2012	https://www.iso.org/standard/53012.html?browse=tc	2.0.0.0	IEC/TS 62622:2012(E), which is a technical specification, specifies the generic terminology for the global and local quality parameters of artificial gratings, interpreted in terms of deviations from nominal positions of grating features, and provides guidance on the categorization of measurement and evaluation methods for their determination. This specification is intended to facilitate communic…
ISO	Current version	Standard	IEC/TS 62607-2-1:2012 - Nanomanufacturing - key control characteristics for CNT film applications - Resistivity — Part 2-1:	May 2012	https://www.iso.org/standard/52933.html?browse=tc	0.0.3.0	This part of IEC 62607 provides a standardized method for categorizing a grade of commercial CNTs in terms of their electrical properties to enable a user to select a CNT material suitable for their application. The method is intended to assess whether the delivered materials from different production batches of the same production process are comparable regarding electrical properties of the fin…
ISO	Current version	Standard	ISO 29701:2010 - Nanotechnologies — Endotoxin test on nanomaterial samples for in vitro systems — Limulus amebocyte lysate (LAL) test	September 2010	https://www.iso.org/standard/45640.html?browse=tc	2.2v.0.0	ISO 29701:2010 describes the application of a test using Limulus amebocyte lysate (LAL) reagent for the evaluation of nanomaterials intended for cell-based in vitro biological test systems. The test is suitable for use with nanomaterial samples dispersed in aqueous media, e.g. water, serum or reaction medium, and to such media incubated with nanomaterials for an appropriate duration at 37 °C. ISO…
ISO	Current version	Standard	ISO/TS 23459:2021 - Nanotechnologies — Assessment of protein secondary structure during an interaction with nanomaterials using ultraviolet circular dichroism	January 2021	https://www.iso.org/standard/75638.html?browse=tc	0.0.0.0	This document specifies measurement protocols and test conditions to determine alterations to protein secondary structure induced by their interaction with nanomaterials using ultraviolet circular dichroism (UV-CD) spectroscopy. This document does not apply to the characterization of conformational changes of disordered proteins.
ISO	Current version	Standard	ISO/TS 23362:2021 - Nanotechnologies — Nanostructured porous alumina as catalyst support for vehicle exhaust emission control — Specification of characteristics and measurement methods	January 2021	https://www.iso.org/standard/75318.html?browse=tc	2.0.0.0	This document specifies characteristics to be measured of nanostructured porous alumina in powder form as catalyst support for vehicle exhaust emission control and their relevant measurement methods. It includes critical characteristics that are required to be measured and additional characteristics that are recommended to be measured, based upon agreement between the interested parties. Measurem…
ISO	Current version	Standard	ISO/TS 22292:2021 - Nanotechnologies — 3D image reconstruction of rod-supported nano-objects using transmission electron microscopy	June 2021	https://www.iso.org/standard/73048.html?browse=tc	0.0.0.0	This document provides guidance for sample preparation, data acquisition by transmission electron microscopy, data processing, and three-dimensional image reconstruction to measure size and shape parameters of nano-objects on rod-shaped supports. The method is applicable to samples dispersed on or within an electron-transparent rod-shaped support.
ISO	Current version	Standard	ISO/TS 22082:2020 - Nanotechnologies — Assessment of nanomaterial toxicity using dechorionated zebrafish embryo	May 2020	https://www.iso.org/standard/72516.html?browse=tc	0.0.0.0	This document specifies a method for rapidly assessing nanomaterial toxicity (fish early life stage, 0 HPF to 120 HPF). It includes information on the importance of acellular chorion removal, detailed chorion removal procedures, and a complete protocol for the toxicity assessment of nanomaterials using dechorionated zebrafish embryos. The focus of this document is on testing nanomaterial toxicity.
ISO	Current version	Hazard testing	ISO/TR 22019:2019 - Nanotechnologies — Considerations for performing toxicokinetic studies with nanomaterials	May 2019	https://www.iso.org/standard/72381.html?browse=tc	0.0.0.0	This document describes the background and principles for toxicokinetic studies relevant for nanomaterials. Annex A shows the definitions for terminology with respect to toxicokinetics as used in OECD TG 417:2010.
ISO	Current version	Standard	ISO/TS 21975:2020 - Nanotechnologies — Polymeric nanocomposite films for food packaging with barrier properties — Specification of characteristics and measurement methods	June 2020	https://www.iso.org/standard/72330.html?browse=tc	2.0.2.0	This document specifies characteristics including barrier properties to be measured of polymeric nanocomposite films used for improving food packaging. The barrier properties cover gas (oxygen), water vapour transmission and UV-Vis light transparency. This document also describes the relevant measurement methods. This document addresses neither safety and health issues related to the food packagi…
ISO	Current version	Standard	ISO/TR 21624:2020 - Nanotechnologies — Considerations for in vitro studies of airborne nano‐objects and their aggregates and agglomerates (NOAA)	April 2020	https://www.iso.org/standard/71273.html?browse=tc	2.0.0.0	This document collates information regarding the systems available for exposure and assessment of nano-objects and their aggregates and agglomerates (NOAA) for in vitro air exposure studies. It provides an overview of the various exposure systems and in vitro cell systems used to perform in vitro studies that simulate an inhalation toxicology study design.
ISO	Current version	Standard	ISO/TS 21412:2020 - Nanotechnologies — Nano-object-assembled layers for electrochemical bio-sensing applications — Specification of characteristics and measurement methods	April 2020	https://www.iso.org/standard/70874.html?browse=tc	2.2.0.0	This document specifies the characteristics to be measured of nano-object-assembled layers on electrodes by means of a solution process and of nano-objects constituting the layers for electrochemical applications such as nano-biosensor or diagnosis applications. It also provides measurement methods for determining the characteristics. It does not apply to: — the requirements of nanostructures by …
ISO	Current version	Standard	ISO/TR 21386:2019 - Nanotechnologies — Considerations for the measurement of nano-objects and their aggregates and agglomerates (NOAA) in environmental matrices	March 2019	https://www.iso.org/standard/70848.html?browse=tc	0.0.0.0	This document provides some considerations for the collection of environmental samples to be analysed for manufactured NOAA, considerations to distinguish manufactured NOAA from background levels of naturally occurring nanoscale particles of the same composition, and preparation procedures to aid in the quantification of manufactured NM in environmental matrices.
ISO	Current version	Standard	ISO 21363:2020 - Nanotechnologies — Measurements of particle size and shape distributions by transmission electron microscopy	June 2020	https://www.iso.org/standard/70762.html?browse=tc	0.0.0.0	This document specifies how to capture, measure and analyse transmission electron microscopy images to obtain particle size and shape distributions in the nanoscale. This document broadly is applicable to nano-objects as well as to particles with sizes larger than 100 nm. The exact working range of the method depends on the required uncertainty and on the performance of the transmission electron …
ISO	Current version	Standard	ISO/TS 21356-1:2021 - Nanotechnologies — Structural characterization of graphene — Part 1: Graphene from powders and dispersions	March 2021	https://www.iso.org/standard/70757.html?browse=tc	0.0.3.0	This document specifies the sequence of methods for characterizing the structural properties of graphene, bilayer graphene and graphene nanoplatelets from powders and liquid dispersions using a range of measurement techniques typically after the isolation of individual flakes on a substrate. The properties covered are the number of layers/thickness, the lateral flake size, the level of disorder, …
ISO	Current version	Standard	ISO/TS 21346:2021 - Nanotechnologies — Characterization of individualized cellulose nanofibril samples	March 2021	https://www.iso.org/standard/70638.html?browse=tc	0.0.3.1	This document specifies characteristics to be measured of individualized cellulose nanofibril (iCNF) samples in suspension and powder forms and their measurement methods. In addition, it provides sample preparation, measurement and data analysis procedures. This document does not apply to the characterization of iCNFs that have been modified after they are manufactured.
ISO	Current version	Standard	ISO/TS 21237:2020 - Nanotechnologies — Air filter media containing polymeric nanofibres — Specification of characteristics and measurement methods	March 2020	https://www.iso.org/standard/70217.html?browse=tc	2.0.2.0	This document specifies the characteristics to be measured of air filter media containing polymeric nanofibres on the surfaces of a substrate. It also describes measurement methods for determining the individual characteristics. This document does not cover characteristics specific for health and safety issues. NOTE The properties/performances assessment of air filter media related to application…
ISO	Current version	Standard	ISO/TS 21236-2:2021 - Nanotechnologies — Clay nanomaterials — Part 2: Specification of characteristics and measurements for clay nanoplates used for gas-barrier film applications	May 2021	https://www.iso.org/standard/73945.html?browse=tc	0.0.1.0	This document specifies characteristics to be measured and measurement methods for clay nanoplate samples in powder and suspension forms used for gas-barrier films. In addition, measurement protocols for the individual characteristics are described. This document does not deal with characteristics of post-manufacturing modification of clay nanoplates. This document does not cover considerations s…
ISO	Current version	Standard	ISO/TS 21236-1:2019 - Nanotechnologies — Clay nanomaterials — Part 1: Specification of characteristics and measurement methods for layered clay nanomaterials	October 2019	https://www.iso.org/standard/70216.html?browse=tc	0.0.1.0	This document specifies characteristics to be measured of layered clay nanomaterials in powder form and chemically modified ones, and describes their relevant measurement methods. This document does not deal with health, safety and environmental issues.
ISO	Current version	Standard	ISO 20814:2019 - Nanotechnologies — Testing the photocatalytic activity of nanoparticles for NADH oxidation	December 2019	https://www.iso.org/standard/69298.html?browse=tc	0.0.0.0	This document specifies a method for the measurement of the photocatalytic activity (PCA) of nanoparticles (NPs), suspended in an aqueous environment in physiologically relevant conditions, by measuring the ultraviolet (UV)-induced nicotine adenine dinucleotide hydrate (NADH) oxidation. The measurement is intended to assess the potential for the photo-toxicity of nanomaterials. The method is also…
ISO	Current version	Standard	ISO/TS 20787:2017 - Nanotechnologies - Aquatic toxicity assessment of manufactured nanomaterials in saltwater lakes using Artemia sp. Nauplii	November 2017	https://www.iso.org/standard/69087.html?browse=tc	0.0.0.0	ISO/TS 20787:2017 specifies a test method, aiming to maximize repeatability and reliability of testing, to determine whether MNMs are toxic to aquatic organisms, specifically Artemia sp. nauplius. ISO/TS 20787:2017 is intended to be used by ecotoxicological laboratories that are capable in the hatching and culturing of Artemia sp. and the evaluation of toxicity of nanomaterials using Artemia sp. …
ISO	Current version	Standard	ISO/TS 20660:2019 - Nanotechnologies — Antibacterial silver nanoparticles — Specification of characteristics and measurement methods	June 2019	https://www.iso.org/standard/68771.html?browse=tc	1.1.1.1	This document provides guidance for the specification of characteristics and relevant measurement methods for silver nanoparticles in powder or colloidal forms that are intended for antibacterial applications in nanotechnology. This document is intended to aid the producer in providing the physicochemical characteristics of silver nanoparticles that have an antibacterial effect to the buyer. This…
ISO	Current version	Standard	ISO/TR 20489:2018 - Nanotechnologies — Sample preparation for the characterization of metal and metal-oxide nano-objects in water samples	December 2018	https://www.iso.org/standard/68198.html?browse=tc	0.0.1.0	This document provides an overview of approaches of sample preparation (i.e. pre-treatment and size-fractionation) for analytical measurements applied to surface and drinking water, potentially containing relevant amounts and types of metal and metal oxide nano-objects, including collection from source and storage of samples, pre-concentration of analytes, and their fractionation.
ISO	Current version	Standard	ISO/TS 19808:2020 - Nanotechnologies — Carbon nanotube suspensions — Specification of characteristics and measurement methods	March 2020	https://www.iso.org/standard/66238.html?browse=tc	0.0.3.0	This document specifies the characteristics to be measured of suspensions containing multi-walled carbon nanotubes (CNT suspensions). It includes the essential and additional characteristics of the CNT suspension, and the corresponding measurement methods. Characteristics specific to health, environmental and safety issues are excluded from this document. WARNING — The use of this document can in…
ISO	Current version	Standard	ISO/TS 19807-1:2019 - Nanotechnologies — Magnetic nanomaterials — Part 1: Specification of characteristics and measurements for magnetic nanosuspensions	June 2019	https://www.iso.org/standard/66237.html?browse=tc	0.0.1.1	This document specifies the characteristics of magnetic nanosuspensions to be measured and lists measurement methods for measuring these characteristics. This is a generic document and does not deal with any particular application.
ISO	Current version	Standard	ISO 19749:2021 - Nanotechnologies — Measurements of particle size and shape distributions by scanning electron microscopy	July 2021	https://www.iso.org/standard/66235.html?browse=tc	0.0.0.0	This document specifies methods of determining nanoparticle size and shape distributions by acquiring and evaluating scanning electron microscope images and by obtaining and reporting accurate results. NOTE 1 This document applies to particles with a lower size limit that depends on the required uncertainty and on the suitable performance of the SEM, which is to be proven first -according to the …
ISO	Current version	Standard	ISO/TR 19733:2019 - Nanotechnologies — Matrix of properties and measurement techniques for graphene and related two-dimensional (2D) materials	March - 2019	https://www.iso.org/standard/66188.html?browse=tc	0.0.3.0	This document provides a matrix which links key properties of graphene and related two-dimensional (2D) materials to commercially available measurement techniques. The matrix includes measurement techniques to characterize chemical, physical, electrical, optical, thermal and mechanical properties of graphene and related 2D materials.
ISO	Current version	Standard	ISO/TR 19716:2016 - Nanotechnologies — Characterization of cellulose nanocrystals	May - 2016	https://www.iso.org/standard/66110.html?browse=tc	0.0.3.1	ISO/TR 19716:2016 reviews commonly used methods for the characterization of cellulose nanocrystals (CNCs), including sample preparation, measurement methods and data analysis. Selected measurands for characterization of CNCs for commercial production and applications are covered. These include CNC composition, morphology and surface characteristics.
ISO	Current version	Standard	ISO/TS 19337:2023 - Nanotechnologies — Characteristics of working suspensions of nano-objects for in vitro assays to evaluate inherent nano-object toxicity	2023-05-01	https://www.iso.org/standard/64652.html?browse=tc	0.0.0.0	ISO/TS 19337:2016 describes characteristics of working suspensions of nano-objects to be considered when conducting in vitro assays to evaluate inherent nano-object toxicity. In addition, this Technical Specification identifies applicable measurement methods for these characteristics. This Technical Specification is applicable to nano-objects, and their aggregates and agglomerates greater than 10…
ISO	Current version	Standard	ISO/TR 19057:2017 - Nanotechnologies — Use and application of acellular in vitro tests and methodologies to assess nanomaterial biodurability	October 2017	https://www.iso.org/standard/63836.html?browse=tc	0.0.0.0	ISO/TR 19057:2017 reviews the use and application of acellular in vitro tests and methodologies implemented in the assessment of the biodurability of nanomaterials and their ligands in simulated biological and environmental media. ISO/TR 19057:2017 is intended to focus more on acellular in vitro methodologies implemented to assess biodurability and, therefore, excludes the general review of relev…
ISO	Current version	Standard	ISO 19007:2018 - Nanotechnologies — In vitro MTS assay for measuring the cytotoxic effect of nanoparticles	April 2018	https://www.iso.org/standard/63698.html?browse=tc	0.0.0.0	ISO 19007:2018 specifies a method for evaluating the effects of nano-objects and their aggregates and agglomerates (NOAA) on cellular viability using the MTS assay. The assay design includes performance requirements and control experiments to identify and manage variability in the assay results. ISO 19007:2018 is applicable to the use of a 96-well plate.
ISO	Current version	Standard	ISO/TS 19006:2016 - Nanotechnologies — 5-(and 6)-Chloromethyl-2’,7’ Dichloro-dihydrofluorescein diacetate (CM-H2DCF-DA) assay for evaluating nanoparticle-induced intracellular reactive oxygen species (ROS) production in RAW 264.7 macrophage cell line	August - 2016	https://www.iso.org/standard/63697.html?browse=tc	0.0.0.0	ISO/TS 19006:2016 describes how to test and evaluate results obtained from in vitro ROS generation in RAW 264.7 macrophage cells exposed to nano-objects, nanoparticles, their aggregates and agglomerates using the CM-H2DCFDA assay. The protocol in ISO/TS 19006:2016 is limited to use of a 24 well plate so if other plates were to be used, volumes would need to be adjusted and the protocol steps vali…
ISO	Current version	Standard	ISO/TR 16197:2014 - Nanotechnologies — Compilation and description of toxicological screening methods for manufactured nanomaterials	May 2014	https://www.iso.org/standard/55827.html?browse=tc	0.0.0.0	ISO/TR 16197:2014 provides a compilation and description of in vitro and in vivo methods that can be useful for the toxicological, including ecotoxicological screening of engineered and manufactured nanomaterials. Toxicological screening tests included in ISO/TR 16197:2014 can be used for such purposes as early decision-making in research and product development, rapid feedback on potential toxic…
ISO	Current version	Standard	ISO/TS 14101:2012 - Surface characterization of gold nanoparticles for nanomaterial specific toxicity screening: FT-IR method	November 2012	https://www.iso.org/standard/54470.html?browse=tc	0.0.1.0	ISO/TS 14101:2012 provides guidelines for the identification of the surface bound molecules using FT-IR of dehydrated gold nanoparticle (AuNPs) films both before and after nanomaterial (NM) cytotoxicity testing.
ISO	Current version	Standard	ISO/TS 13278:2017 - Nanotechnologies — Determination of elemental impurities in samples of carbon nanotubes using inductively coupled plasma mass spectrometry	November 2017	https://www.iso.org/standard/69310.html?browse=tc	0.0.3.0	ISO/TS 13278:2017 provides methods for the determination of residual elements other than carbon in samples of single-wall carbon nanotubes (SWCNTs) and multiwall carbon nanotubes (MWCNTs) using inductively coupled plasma mass spectrometry (ICP-MS). The purpose of this document is to provide optimized digestion and preparation procedures for SWCNT and MWCNT samples in order to enable accurate and …
ISO	Current version	Standard	ISO/TR 13014:2012/COR 1:2012 - Nanotechnologies — Guidance on physico-chemical characterization of engineered nanoscale materials for toxicologic assessment — Technical Corrigendum 1	July 2012	https://www.iso.org/standard/62390.html?browse=tc	0.0.0.0	Not available refer to ISO/TR 13014:2012
OECD	Current version	Report	No. 92 - Ability of biopersistent/biodurable manufactured nanomaterials (MNs) to induce lysosomal membrane permeabilization (LMP) as a prediction of their long-term toxic effects	2020-12-22	https://www.oecd.org/env/ehs/nanosafety/publications-series-safety-manufactured-nanomaterials.htm	0.0.0.0	This document describes the expanding knowledge on the implications and biological significance of lysosomal and autophagy dysfunction and the subsequent assembly and activation of inflammasome NLRP3 induced by biodurable manufactured nanomaterials.
OECD	Current version	Report	No. 96 - Moving Towards a Safe(r) Innovation Approach (SIA) for More Sustainable Nanomaterials and Nano-enabled Products	2020-12-22	https://www.oecd.org/env/ehs/nanosafety/publications-series-safety-manufactured-nanomaterials.htm	0.0.0.0	Technological innovations such as nanotechnology are being developed at such a rapid pace that they present a challenge to health and environmental risk assessment. Because of this rapid innovation, a gap can arise between technological innovations and the development of suitable risk assessment tools and frameworks.
OECD	Current version	Report	No. 97 -Developments in Delegations on the Safety of Manufactured Nanomaterials – Tour de Table	2020-12-22	https://www.oecd.org/env/ehs/nanosafety/publications-series-safety-manufactured-nanomaterials.htm	0.0.0.0	This document compiles information provided by delegations on the occasion of the 20th WPMN meeting (September 2020). It aims to summarise relevant information on activities related to manufactured nanomaterials, as well as other activities on nanotechnologies at the international level.
OECD	Current version	Report	No. 93 - Advancing Adverse Outcome Pathway (AOP) Development for Nanomaterial Risk Assessment and Categorisation/ PART1: Final Project Report and Recommendations with Methodology to Prioritise Key Events (KEs) Relevant for Manufactured Nanomaterials	2020-12-18	https://www.oecd.org/env/ehs/nanosafety/publications-series-safety-manufactured-nanomaterials.htm	0.0.0.0	The WPMN launched the project Advancing Adverse Outcome Pathway (AOP). Development for Nanomaterial Risk Assessment and Categorisation. The objective is to contribute to the future development and application of AOPs for MN regulatory decision making, by following the principles established by the OECD Extended Advisory Group on Molecular Screening and Toxicogenomics (EAGMST). The outcomes of the…
OECD	Current version	Report	No. 94 - Advancing Adverse Outcome Pathway (AOP) Development for Nanomaterial Risk Assessment and Categorisation/ PART2: Case Study on Tissue Injury	2020-12-18	https://www.oecd.org/env/ehs/nanosafety/publications-series-safety-manufactured-nanomaterials.htm	0.0.0.0	The WPMN launched the project Advancing Adverse Outcome Pathway (AOP). Development for Nanomaterial Risk Assessment and Categorisation. The objective is to contribute to the future development and application of AOPs for MN regulatory decision making, by following the principles established by the OECD Extended Advisory Group on Molecular Screening and Toxicogenomics (EAGMST). The outcomes of the…
OECD	Current version	Report	No. 95 - Advancing Adverse Outcome Pathway (AOP) Development for Nanomaterial Risk Assessment and Categorisation/ PART3: Workshop Report and Recommendations	2020-12-18	https://www.oecd.org/env/ehs/nanosafety/publications-series-safety-manufactured-nanomaterials.htm	0.0.0.0	The WPMN launched the project Advancing Adverse Outcome Pathway (AOP). Development for Nanomaterial Risk Assessment and Categorisation. The objective is to contribute to the future development and application of AOPs for MN regulatory decision making, by following the principles established by the OECD Extended Advisory Group on Molecular Screening and Toxicogenomics (EAGMST). The outcomes of the…
OECD	Current version	Report	No. 103 - Important Issues on Risk Assessment of Manufactured Nanomaterials	2022-02-03	https://www.oecd.org/officialdocuments/publicdisplaydocumentpdf/?cote=ENV-CBC-MONO(2022)3%20&doclanguage=en	0.0.0.0	This document, Important Issues on Risk Assessment of Manufactured Nanomaterials, provides the current practices, challenges and strategies for assessing risk of manufactured nanomaterials in circumstances where data is limited, and there is a necessity for more research on specific risk assessment issues. As such, the document presents an overview of the chemical risk assessment paradigm and des…
OECD	Current version	Report	No. 101- Evaluation of Tools and Models for Assessing Occupational and Consumer Exposure to Manufactured Nanomaterials; Part III: Performance testing results of tools/models for consumer exposure	2021-11-23	https://www.oecd.org/officialdocuments/publicdisplaydocumentpdf/?cote=ENV-CBC-MONO(2021)29%20&doclanguage=en	0.0.0.0	Under the first objective of the project, an inventory of available models/tools for assessing consumer exposure to MNM was created through an extensive literature review of peer-reviewed publications, the outcomes from recent international projects and inventories, and consultation with OECD WPMN. The inventory includes 15 nano-specific models/tools relevant to consumer exposure to MNM and 9 che…
OECD	Current version	Report	No. 99 - Evaluation of Tools and Models for Assessing Occupational and Consumer Exposure to Manufactured Nanomaterials; Part I: Compilation of tools/models and analysis for further evaluation.	2021-11-23	https://www.oecd.org/officialdocuments/publicdisplaydocumentpdf/?cote=ENV-CBC-MONO(2021)27%20&doclanguage=en	0.0.0.0	1. Project - “Assessing the global readiness of regulatory and non-regulatory models for assessing occupational exposure to manufactured nanomaterials”: The objective is to compile available regulatory and non-regulatory tools and models for the assessment of occupational exposure to manufactured nanomaterials and to assess their applicability for occupational exposure to manufactured nanomateria…
OECD	Current version	Report	No. 98 - Evaluation of Tools and Models Used for Assessing Environmental Exposure to Manufactured Nanomaterials; Functional Assessment and Statistical Analysis of Nano-Specific Environmental Exposure Tools and Models	2021-11-23	https://www.oecd.org/officialdocuments/publicdisplaydocumentpdf/?cote=ENV-CBC-MONO(2021)23%20&doclanguage=en	0.0.0.0	The objective of this project is to compile available tools and models for the assessment of environmental exposure to manufactured nanomaterials, and to conduct an analysis of their applicability for use in regulatory exposure assessment,
OECD	Current version	Report	No. 100 - Evaluation of Tools and Models for Assessing Occupational and Consumer Exposure to Manufactured Nanomaterials; Part II: Performance testing results of tools/models for occupational exposure (Annex 1)	2021-10-19	https://www.oecd.org/officialdocuments/publicdisplaydocumentpdf/?cote=ENV/CBC/MONO(2021)28&docLanguage=En	0.0.0.0	The objective of this report is to conduct a performance testing assessment of the occupational exposure assessment tools selected in the ENV/CBC/MONO(2021)27 report for its application to manufactured nanomaterials.
OECD	Current version	Hazard testing	Test No. 412: Subacute Inhalation Toxicity: 28-Day Study	2018-06-27	https://www.oecd-ilibrary.org/environment/test-no-412-subacute-inhalation-toxicity-28-day-study_9789264070783-en	0.0.0.0	This revised Test Guideline 412 (TG 412) has been designed to fully characterize test article toxicity by the inhalation route following repeated exposure for a limited period of time (28 days), and to provide data for quantitative inhalation risk assessments. It was updated in 2017 to enable the testing and characterisation of effects of nanomaterials tested. Groups of at least 5 male and 5 fema…
OECD	Current version	Hazard testing	Test No. 413: Subchronic Inhalation Toxicity: 90-day Study	2018-06-25	https://www.oecd-ilibrary.org/environment/test-no-413-subchronic-inhalation-toxicity-90-day-study_9789264070806-en	0.0.0.0	This revised Test Guideline 413 (TG 413) has been designed to fully characterize test article toxicity by the inhalation route following repeated exposure for a period of 90 days, and to provide data for quantitative inhalation risk assessments. It was updated in 2017 to enable the testing and characterisation of effects of nanomaterials tested. Groups of at least 10 male and 10 female rodents ar…
OECD	Current version	Guideline	Test No. 318: Dispersion Stability of Nanomaterials in Simulated Environmental Media	2017-10-09	https://www.oecd-ilibrary.org/environment/test-no-318-dispersion-stability-of-nanomaterials-in-simulated-environmental-media_9789264284142-en	0.0.0.0	This test guideline describes a test procedure to gain information on dispersion stability of manufactured nanomaterials in simulated environmental media. Based on the results it is possible to categorise tested nanomaterials into three different classes according to their dispersion stability in tested aqueous media. These classifies nanomaterials of low dispersion stability or high dispersion s…
OECD	Current version	Guideline	Titanium dioxide (NM100-NM105) - Manufactured nanomaterial	2016-11-28	https://www.oecd.org/chemicalsafety/nanosafety/titanium-dioxide-nm100-nm105-manufactured-nanomaterial.htm	2.0.1.0	This document presents the Dossier of Dendrimers in which this nanomaterial has been tested for a number of endpoints for: i) Nanomaterials Information / Identification; ii) Physical-Chemical Properties; iii) Environmental Fate; iv) Environmental Toxicology; and v) Material Safety
OECD	Current version	Guideline	Single-walled carbon nanotubes (SWCNTs) - Manufactured nanomaterial	2016-07-07	https://www.oecd.org/chemicalsafety/nanosafety/single-walled-carbon-nanotubes-swcnts-manufacturednanomaterial.htm	0.0.3.0	This document presents the Dossier of Dendrimers in which this nanomaterial has been tested for a number of endpoints for: i) Nanomaterials Information / Identification; ii) Physical-Chemical Properties; iii) Environmental Fate; iv) Environmental Toxicology; and v) Material Safety
OECD	Current version	Guideline	Fullerenes (C60) - Manufactured nanomaterial	2016-07-01	https://www.oecd.org/chemicalsafety/nanosafety/fullerenes-c60-manufacturednanomaterial.htm	0.0.3s.1	This document presents the Dossier of Dendrimers in which this nanomaterial has been tested for a number of endpoints for: i) Nanomaterials Information / Identification; ii) Physical-Chemical Properties; iii) Environmental Fate; iv) Environmental Toxicology; and v) Material Safety.
OECD	Current version	Guideline	Multi-walled carbon nanotubes (MWCNTs) - Manufactured nanomaterial	2016-06-30	https://www.oecd.org/chemicalsafety/nanosafety/multi-walled-carbon-nanotubes-mwcnts-manufacturednanomaterial.htm	0.0.3.0	This document presents the Dossier of Dendrimers in which this nanomaterial has been tested for a number of endpoints for: i) Nanomaterials Information / Identification; ii) Physical-Chemical Properties; iii) Environmental Fate; iv) Environmental Toxicology; and v) Material Safety.
OECD	Current version	Guideline	Silicon dioxide - Manufactured nanomaterial	2016-06-08	https://www.oecd.org/chemicalsafety/nanosafety/silicon-dioxide-manufactured-nanomaterial.htm	2.0.1.0	This document presents the Dossier of Dendrimers in which this nanomaterial has been tested for a number of endpoints for: i) Nanomaterials Information / Identification; ii) Physical-Chemical Properties; iii) Environmental Fate; iv) Environmental Toxicology; and v) Material Safety.
OECD	Current version	Guideline	Silver nanoparticles - Manufactured nanomaterial	2016-01-13	https://www.oecd.org/chemicalsafety/nanosafety/silver-nanoparticles-manufactured-nanomaterial.htm	1.1.1.1	This document presents the Dossier of Dendrimers in which this nanomaterial has been tested for a number of endpoints for: i) Nanomaterials Information / Identification; ii) Physical-Chemical Properties; iii) Environmental Fate; iv) Environmental Toxicology; and v) Material Safety.
OECD	Current version	Guideline	Zinc oxide - Manufactured nanomaterial	2015-12-17	https://www.oecd.org/officialdocuments/publicdisplaydocumentpdf/?cote=ENV/JM/MONO(2015)15/PART1&docLanguage=En	2.0.1.0	This document presents the Dossier of Dendrimers in which this nanomaterial has been tested for a number of endpoints for: i) Nanomaterials Information / Identification; ii) Physical-Chemical Properties; iii) Environmental Fate; iv) Environmental Toxicology; and v) Material Safety
OECD	Current version	Guideline	Nanoclays - Manufactured nanomaterial	2015-06-02	https://www.oecd.org/chemicalsafety/nanosafety/nanoclays-manufacturednanomaterial.htm	0.0.1.0	This document presents the Dossier of Dendrimers in which this nanomaterial has been tested for a number of endpoints for: i) Nanomaterials Information / Identification; ii) Physical-Chemical Properties; iii) Environmental Fate; iv) Environmental Toxicology; and v) Material Safety.
OECD	Current version	Guideline	Gold nanoparticles - Manufactured nanomaterial	2015-05-29	https://www.oecd.org/chemicalsafety/nanosafety/gold-nanoparticles-manufacturednanomaterial.htm	0.0.1.1	This document presents the Dossier of the Gold Nanoparticles (NM 330) which was prepared under the leadership of South Africa. This nanomaterial has been tested for a number of endpoints for: i) Nanomaterials Information / Identification; ii) Physical-Chemical Properties; iii) Environmental Fate; iv) Environmental Toxicology; v) Mammalian Toxicology; and vi) Material Safety.
OECD	Current version	Guideline	Dendrimers - Manufactured nanomaterial	2015-05-29	https://www.oecd.org/officialdocuments/publicdisplaydocumentpdf/?cote=env/jm/mono(2015)9&doclanguage=en	0.0.2.1	This document presents the Dossier of Dendrimers which was prepared under the leadership of Spain. This nanomaterial has been tested for a number of endpoints for: i) Nanomaterials Information / Identification; ii) Physical-Chemical Properties; iii) Environmental Fate; iv) Environmental Toxicology; and v) Material Safety.
OECD	Current version	Guideline	Cerium oxide - Manufactured nanomaterial	2015-05-29	https://www.oecd.org/chemicalsafety/nanosafety/cerium-oxide-manufactured-nanomaterial.htm	2.0.1.0	This document presents the Dossier of Cerium dioxide. This nanomaterial has been tested for a number of endpoints for: i) Nanomaterials Information / Identification; ii) Physical-Chemical Properties; iii) Environmental Fate; iv) Environmental Toxicology; v) Mammalian Toxicology; and vi) Material Safety.
OECD	Final	Guideline	Particle Size Distribution/Fibre Length and Diameter Distributions	1981-05-17	https://www.oecd-ilibrary.org/environment/test-no-110-particle-size-distribution-fibre-length-and-diameter-distributions_9789264069688-en	0.0.0.0	Many methods are available for particle size measurements, but none of them is applicable to the entire size range. Sieving, microscopic sedimentation and elutriation techniques are most commonly employed. Moreover, in the case of airborne particles (dusts, smokes, fumes) radiation scattering and inertial methods prove particularly useful. Finally, appropriate sampling procedures should be select…
