# Supplementary material for: Implementing Horizon Scanning as a tool for the strategic development of regulatory guidelines for nanotechnology-enabled health products
Source: Frontiers journal article supplement (doi:10.3389/fmed.2023.1308047), 2024-01-11
Supplement: Table_1.pdf [file Table_1.pdf]

# Implementing Horizon Scanning as a Tool for the Strategic Development of Regulatory Guidelines for Nanotechnology-Enabled Health Products

Francisco D. Rodríguez-Gómez<sup>1,2\*</sup>, Dominique Monferrer<sup>1</sup>, Oriol Penon<sup>1</sup>, Pilar Rivera-Gil<sup>2</sup>

<sup>1</sup>Asphalion SL, Barcelona, Spain

<sup>2</sup>Integrative Biomedical Materials and Nanomedicine Lab, Department of Medicine and Life Sciences, Universitat Pompeu Fabra Barcelona Biomedicine Research Park (PRBB) Doctor Aiguader, 88, Barcelona, Spain

**\* Correspondence:**

Corresponding Author

[franciscodiego.rodriiguez01@estudiant.upf.edu](mailto:franciscodiego.rodriiguez01@estudiant.upf.edu)

**Keywords:** Regulatory Science, Horizon Scanning, Nanomedicines, Nanotechnology-Enabled Health Products, Regulatory Guidelines.

*SUPPLEMENTARY MATERIAL*

**Supplementary Table 1: Design solutions identified for selected signals.**

| Code                                                                                             | Descriptor                                          | Definition                                                             | Code    | Descriptor                   | Definition                                                                     | Code     | Descriptor                        | Definition                                                                                                                                                                                            |
|--------------------------------------------------------------------------------------------------|-----------------------------------------------------|------------------------------------------------------------------------|---------|------------------------------|--------------------------------------------------------------------------------|----------|-----------------------------------|-------------------------------------------------------------------------------------------------------------------------------------------------------------------------------------------------------|
| Products with pharmacological, immunological, or metabolic action of therapeutic/treating effect |                                                     |                                                                        | I.T.2.1 | Moisturizer / Emollient      | Moisturizing or emollient substances at the nanoscale                          | B.T.2.2v | Nanomaterials for 3D cell culture | Nanomaterials generating 3D-structure for mimetic in vivo conditions in cell cultures                                                                                                                 |
| A.T.1.1                                                                                          | Gene editing or modification of the gene expression | Gene editing for the modification of gene expression (e.g., CRISPR)    | J.T.2.1 | Bone grafting material       | Nanomaterial used for filling bone defects, mimeting extracellular bone matrix | C.T.2.2v | Nano adsorbent                    | Substances attached to a platform that specifically adsorbs other substances allowing its detection (e.g. antibodies attached in a surface in lateral flow assays)                                    |
| B.T.1.1                                                                                          | Antibacterial action                                | Antibacterial action in a broad sense based on pharmacological means   | K.T.2.1 | Sunscreen                    | Physical or chemical sunscreen at the nanoscale                                | D.T.2.2v | Photothermal assay                | A probe with photothermal properties when attached to a given substrate. Positive signal is translated in an increased temperature that can be measure with a Forward-looking infrared (FLIR) camera. |
| C.T.1.1                                                                                          | Anti-inflammatory action                            | Anti-inflammatory action in a broad sense based on immunological means | L.T.2.1 | Acoustic therapy             | Generation of physical stress (movement/heat) upon sound stimulation           | Y.T.2.2v | Various                           |                                                                                                                                                                                                       |
| D.T.1.1                                                                                          | Antiviral action                                    | Antiviral action in a broad sense based on pharmacological means       | M.T.2.1 | Optical droplet vaporization | Generation of air droplets upon light induction                                | Z.T.2.2v | Not sufficiently defined          |                                                                                                                                                                                                       |

## Running Title

| Code    | Descriptor                       | Definition                                                                                                                          | Code    | Descriptor                                   | Definition                                                                            | Code                                                                                    | Descriptor                           | Definition                                                                                                                                 |
|---------|----------------------------------|-------------------------------------------------------------------------------------------------------------------------------------|---------|----------------------------------------------|---------------------------------------------------------------------------------------|-----------------------------------------------------------------------------------------|--------------------------------------|--------------------------------------------------------------------------------------------------------------------------------------------|
| E.T.1.1 | Metabolite-based supplementation | Enhancement of physiological functions based on the supplementation of metabolites or substrates for involved biochemical processes | N.T.2.1 | Nanoparticle-assisted laser tissue soldering | Solder nanomaterial that upon light induction heats and allowing soldering of tissues | Products with non-pharmacological, immunological, or metabolic action of galenic effect |                                      |                                                                                                                                            |
| F.T.1.1 | Immunological modulation         | Modulation of the immune system based on the use of (modified) immune-mediators such as Igmo or T-CARs cells                        | Ñ.T.2.1 | Structural action                            | Nanomaterials used solely as a construction material of medical devices               | A.T.2.3                                                                                 | Protein-based nanocarrier            | Drug carrier made of poly/oligopeptides (nanocapsules, drug binded to a nanoprotein, etc)                                                  |
| G.T.1.1 | ROS-mediated cytotoxicity        | Generation of ROS for inducing cell lysis (typically related to a antitumoral activity)                                             | O.T.2.1 | Cryotherapy                                  | Substances that are cooled down and used for cryotherapy                              | B.T.2.3                                                                                 | Molecular building block nanocarrier | Drug carrier made of polymers (except protein or nucleic acids which are specifically addressed by DSC A.T.2.3 and Ñ.T.2.3, respectively). |
| H.T.1.1 | Photodynamic therapy             | ROS generation upon photo-stimulation                                                                                               | P.T.2.1 | Radioisotope chelator                        | Substance used for chelating radioisotopes at an specific location                    | C.T.2.3                                                                                 | Lipid nanocarrier                    | Drug carrier made of lipid, in a broad sense                                                                                               |
| I.T.1.1 | Tissue regeneration enhancer     | Technology containing bioactive signals that induce healing (e.g. by recruitment of immune cells)                                   | Q.T.2.1 | Radioprotector                               | Substances used for radiation protection                                              | D.T.2.3                                                                                 | Nanoemulsion-based nanocarrier       | Carrier consisting of nanodroplets (including both, W/O or O/W nanoemulsions)                                                              |
| J.T.1.1 | Cell protection                  | Attenuation of toxicity                                                                                                             | R.T.2.1 | Thermotherapy                                | Substances that are heated up and used for thermotherapy                              | E.T.2.3                                                                                 | Lipid bilayer nanocarrier            | Carrier consisting of a lipid bilayer nanovesicle                                                                                          |

## Running Title

| Code                                                                                                 | Descriptor                     | Definition                                                                                                                                                   | Code                                                                                       | Descriptor                               | Definition                                                                                                                                                                                                    | Code    | Descriptor                          | Definition                                                                         |
|------------------------------------------------------------------------------------------------------|--------------------------------|--------------------------------------------------------------------------------------------------------------------------------------------------------------|--------------------------------------------------------------------------------------------|------------------------------------------|---------------------------------------------------------------------------------------------------------------------------------------------------------------------------------------------------------------|---------|-------------------------------------|------------------------------------------------------------------------------------|
| K.T.1.1                                                                                              | Antitumoral activity           | Cytotoxic effect broadly applicable for the treatment of cancer (not necessarily limited to ROS generation)                                                  | S.T.2.1                                                                                    | <i>In vivo</i> circulating cell adhesion | Substances that bind targeted cell types <i>in vivo</i> and induce their accumulation or removal                                                                                                              | F.T.2.3 | Prevention from fogging or smearing | Lents coating designed for preventing fogging or smearing                          |
| L.T.1.1                                                                                              | Miniaturized existing medicine | Free medicines at the nanoscale that are part of a dispersed system wherein they are included in a dispensing carrier agent (e.g. dispersion, aerosol, etc.) | T.T.2.1                                                                                    | Upconverting nanoparticles               | Particles that exhibit photon up conversion. This is a process in which the sequential absorption of two or more photons leads to the emission of light at shorter wavelength than the excitation wavelength. | G.T.2.3 | Carbon-based nanocarrier            | Drug carrier made of organic molecules or molecules with a carbon skeleton         |
| M.T.1.1                                                                                              | Hemostatic agent               | Substances that induce blood clotting                                                                                                                        | U.T.2.1                                                                                    | Renal clearance                          | Particles intended to undergo renal clearance                                                                                                                                                                 | H.T.2.3 | pH-responsive nanocarrier           | Smart nanoparticle that activates when a certain pH is achieved - physical trigger |
| N.T.1.1                                                                                              | Lipid <i>in vivo</i> transport | Physiological lipid transport mimetic                                                                                                                        | W.T.2.1                                                                                    | Oscillation                              | Particle induced oscillation for mechanical ablation of cells                                                                                                                                                 | I.T.2.3 | Metal nanocarrier                   | Drug carrier made of metal                                                         |
| Y.T.1.1                                                                                              | Various                        |                                                                                                                                                              | Y.T.2.1                                                                                    | Various                                  |                                                                                                                                                                                                               | J.T.2.3 | Oxygen-responsive nanocarrier       | Smart nanoparticle that activated when a certain temperature is achieved           |
| Z.T.1.1                                                                                              | Not sufficiently defined       |                                                                                                                                                              | Z.T.2.1                                                                                    | Not sufficiently defined                 |                                                                                                                                                                                                               | K.T.2.3 | Temperature-responsive nanocarrier  | Smart nanoparticle that activates when a certain temperature is achieved           |
| Products with pharmacological, immunological, or metabolic action of therapeutic/prophylactic effect |                                |                                                                                                                                                              | Products with non-pharmacological, immunological, or metabolic action of diagnostic effect |                                          |                                                                                                                                                                                                               | L.T.2.3 | Magnetic-field targeted nanocarrier | Magnetic nanoparticle that can be guided or activated (e.g., warmed) based of      |

## Running Title

| Code                                                                                        | Descriptor                | Definition                                                                                                                                                        | Code    | Descriptor                       | Definition                                                                                                                                                                                 | Code    | Descriptor                            | Definition                                                                                                         |
|---------------------------------------------------------------------------------------------|---------------------------|-------------------------------------------------------------------------------------------------------------------------------------------------------------------|---------|----------------------------------|--------------------------------------------------------------------------------------------------------------------------------------------------------------------------------------------|---------|---------------------------------------|--------------------------------------------------------------------------------------------------------------------|
|                                                                                             |                           |                                                                                                                                                                   |         |                                  |                                                                                                                                                                                            |         |                                       | magnetic field exposure                                                                                            |
| A.T.1.2                                                                                     | Vaccine adjuvant          | Material which is incorporated with a vaccine for the purpose of enhancing the immune response of the vaccine                                                     | A.T.2.2 | Naked eye detection              | Substances that are injected so that they distribute and accumulate in certain regions allowing it identification (e.g. lymph tracer). NIR imaging is an example of this type of detection | M.T.2.3 | Antioxidant nanocarrier               | Nanoparticle that acts as a ROS scavenger                                                                          |
| Y.T.1.2                                                                                     | Various                   |                                                                                                                                                                   | B.T.2.2 | MRI contrast agent               | Substances for improving visibility in medical imaging based on MRI                                                                                                                        | N.T.2.3 | Electric-field responsive nanocarrier | Nanoparticle that changes its configuration upon electrical stimulation                                            |
| Z.T.1.2                                                                                     | Not sufficiently defined  |                                                                                                                                                                   | C.T.2.2 | Photoluminescence contrast agent | Substances with inner luminescent properties                                                                                                                                               | Ñ.T.2.3 | Nucleic acid nanocarrier              | Drug carrier made of nucleic acids, in a broad sense                                                               |
| Products with non-pharmacological, immunological, or metabolic action of therapeutic effect |                           |                                                                                                                                                                   | D.T.2.2 | PET / SPECT contrast agents      | Substances for improving visibility in medical imaging based on PET/SPECT                                                                                                                  | O.T.2.3 | Ultrasound-responsive nanocarrier     | Smart nanoparticle compromising nanobubbles loading with medicinal products that release upon ultrasound induction |
| A.T.2.1                                                                                     | Wound dressing            | Film/coverage to physically protect injuries from external agents. Typically, these protective films ensure optimal conditions for tissue healing are maintained. | E.T.2.2 | Multimodal imaging               |                                                                                                                                                                                            | P.T.2.3 | Radiosensitive nanocarrier            | Smart nanoparticle that activates when exposed to a radiation field                                                |
| B.T.2.1                                                                                     | <i>In vivo</i> monitoring | Invasive or body contacting technologies which are aimed                                                                                                          | F.T.2.2 | Photoacoustic imaging            | Substances for improve visibility in medical imaging based on echography                                                                                                                   | Q.T.2.3 | Biological barrier disruptor          | Smart carrier designed to disrupt/alter biological barrier                                                         |

## Running Title

| Code    | Descriptor                              | Definition                                                                                                        | Code                                                                                                | Descriptor                                               | Definition                                                                                                               | Code    | Descriptor               | Definition                                               |
|---------|-----------------------------------------|-------------------------------------------------------------------------------------------------------------------|-----------------------------------------------------------------------------------------------------|----------------------------------------------------------|--------------------------------------------------------------------------------------------------------------------------|---------|--------------------------|----------------------------------------------------------|
|         |                                         | at monitoring different parameters. They are not considered contact agents as they would have a diagnostic action |                                                                                                     |                                                          | (ultrasound contrast agents)                                                                                             |         |                          | upon stimulation making it permeable to cargo substances |
| C.T.2.1 | Electro modulation of the neural system | Components for electro-modulation of nerves (heart, retina, etc)                                                  | G.T.2.2                                                                                             | <i>In vivo</i> electrochemical detection                 | Invasive or body contacting technologies which are aimed at the diagnosis based on an electrochemical detection/reaction | Y.T.2.3 | Various                  |                                                          |
| D.T.2.1 | Osteoconductive nanostructures          | Implant nanostructures which provide with structural support and that can allow tissue regeneration               | H.T.2.2                                                                                             | Nuclear medicine contract agent (radio-active substance) | Substances for improving visibility in medical imaging based on nuclear medicine                                         | Z.T.2.3 | Not sufficiently defined |                                                          |
| E.T.2.1 | Dental filling/replacement material     | Nanomaterial used for the treatment of dental cavities or tooth defects or cavities                               | Y.T.2.2                                                                                             | Various                                                  |                                                                                                                          |         |                          |                                                          |
| F.T.2.1 | Photothermal therapy                    | Generation of heat upon light stimulation                                                                         | Z.T.2.2                                                                                             | Not sufficiently defined                                 |                                                                                                                          |         |                          |                                                          |
| G.T.2.1 | Radiation sensitizer                    | Generation of heat upon radiation for radio-therapy enhancement                                                   | Products with non-pharmacological, immunological, or metabolic action of in vitro diagnostic effect |                                                          |                                                                                                                          |         |                          |                                                          |
| H.T.2.1 | Nano-sieve                              | Nanopored structure for filtering (e.g. dialyses membranes)                                                       | A.T.2.2v                                                                                            | Fluorescent tracker                                      | Fluorescent substances that attached to substances/structures                                                            |         |                          |                                                          |

## Running Title

| Code | Descriptor | Definition | Code | Descriptor | Definition             | Code | Descriptor | Definition |
|------|------------|------------|------|------------|------------------------|------|------------|------------|
|      |            |            |      |            | allowing its detection |      |            |            |
